1 **Performance in a novel environment subject to ghost competition.**

2 Running title: Ghost competition in novel environment

3

4 Karen Bisschop<sup>1,2</sup>, Frederik Mortier<sup>2</sup>, Dries Bonte<sup>2‡</sup>, Rampal S. Etienne<sup>1‡</sup>

5 ‡ Joint last authorship

6 <sup>1</sup> Groningen Institute for Evolutionary Life Sciences, University of Groningen, P.O.

7 Box 11103, NL-9700 CC Groningen, The Netherlands

8 <sup>2</sup> TEREK (Terrestrial Ecology Unit), Department of Biology, Ghent University, Karel

9 Lodewijk Ledeganckstraat 35, B-9000 Ghent, Belgium

10

11 Corresponding author: Karen Bisschop, [kbisschop.evo@gmail.com](mailto:kbisschop.evo@gmail.com)

12

13 **Key words:** interspecific competition, intraspecific competition, experimental evolution, local  
14 adaptation, spider mites, priority effects

15

16 The data will be stored at Dryad upon acceptance.

17 ABSTRACT

18 A central tenet of evolutionary theory of communities is that both intra- and interspecific  
19 interactions impact evolutionary processes such as local adaptation. The precise nature of this  
20 impact is still an open question. Here, we studied the fitness effects of inter- and intraspecific  
21 competition using experimental evolution with spider mites as a model. We transferred  
22 *Tetranychus urticae* onto a novel host plant under presence or absence of a competing species,  
23 *T. ludeni*. We found that, with a competitor present, populations under higher densities of the  
24 competitor reached higher fecundity. In fact the populations with highest competitor densities  
25 evolved similar oviposition rates as the populations without a competitor present, suggesting  
26 that selection due to interspecific competition is of a similar magnitude as selection under  
27 intraspecific competition. Moreover, while the competitor, *T. ludeni*, already went extinct  
28 soon after the start of the experimental evolution, its effect on *T. urticae* lasted over at least 25  
29 generations. Early experienced selection pressures, even from unsuccessful competitor  
30 species, can therefore exert a lasting evolutionary signal on species' performance in novel  
31 environments.

## 32 INTRODUCTION

33 Species are facing a continuously changing world. If they are unable to track their favoured  
34 habitat or to cope with the novel environment through phenotypic plasticity, evolutionary  
35 rescue by genetic adaptation can eventually allow persistence if the necessary conditions are  
36 fulfilled (i.e. genetic variation in traits that are responsible for such adaptations, their  
37 heritability and the strength of the selection pressures) (Lindsey *et al.*, 2013). Intraspecific  
38 competition is an essential ingredient of selection and hence evolution, and can be expected to  
39 have a much larger impact on evolution than interspecific competition because niche overlap  
40 is larger within than among species (Bolnick, 2001; Svanbäck & Bolnick, 2007).

41

42 Interspecific competition is, however, also known to influence this adaptation process to the  
43 environment but the effect is still largely unpredictable (Rice & Knapp, 2008; Alzate *et al.*,  
44 2017; Zhao *et al.*, 2018). First, heterospecific competitors might modify the selection pressure  
45 exerted by the abiotic environment, thereby enhancing or limiting genetic adaptation to the  
46 novel environment (Osmond & de Mazancourt, 2013). Classical examples of enhanced  
47 genetic adaptation are seen in adaptive radiations of three-spined sticklebacks or fast character  
48 displacements in Darwin finches or Myzomelid honeyeaters (Diamond *et al.*, 1989; Schluter,  
49 1994; Reznick & Ghalambor, 2001). In previous work we found that additional selection  
50 pressure exerted by a congeneric species, facilitated adaptation of the focal species to a novel  
51 environment under high dispersal from a maladapted mainland population (Alzate *et al.*,  
52 2017). Hence interspecific competition counteracted the effects of genetic load. Adaptation to  
53 the novel environment can also be reduced by interspecific competition when a population  
54 adapts more towards the competing species than to the novel environment (Siepielski *et al.*,  
55 2016). Secondly, new niches can be constructed with the introduction of interspecific  
56 competition such as the use of waste products from coexisting individuals (Lawrence *et al.*,

57 2012) or, in the case of arthropod herbivores, by modification of plant defences (Sarmiento *et*  
58 *al.*, 2011). The new niches will subsequently open new avenues for adaptive shifts to novel  
59 environmental conditions. Third, interspecific competition can obviously hinder the process  
60 of local adaptation by restricting resource availability, and hence decrease effective  
61 population size. The resulting increased probabilities of genetic drift will then decrease the  
62 evolutionary potential and hence the chance of local adaptation (Lawrence *et al.*, 2012;  
63 Osmond & de Mazancourt, 2013; Zhao *et al.*, 2018).

64

65 While inferior competitors are expected to eventually become extinct, they may coexist with  
66 the superior competitor for many generations (Holmes & Wilson, 1998; Lankau, 2011). These  
67 early and non-persisting interactions may generate a strong signature on the future community  
68 dynamics (Law & Daniel Morton, 1996; Miller, terHorst, & Burns, 2009; Mallon *et al.*, 2018)  
69 because they have the possibility to induce strong habitat modifications or evolutionary  
70 changes in the extant species. Historical contingency in terms of limitations imposed by so-  
71 called ghost species (Hawkes & Keitt, 2015), may thus have a strong impact on the ecological  
72 and evolutionary trajectories of populations and communities, in the same way as successful  
73 species do (Fukami, 2015). Research investigating the role of competition intensity of an  
74 inferior species prior to its extinction on persisting species is largely unknown and remains to  
75 be discovered.

76

77 Here we present results from experimental evolution with an herbivore arthropod,  
78 *Tetranychus urticae* Koch, that was confronted with a congeneric competitor, *T. ludeni*  
79 Zacher, during adaptation to a novel host. The competitor was chosen to be competitively  
80 similar to the focal species, but the experiment demonstrated its inferiority: it coexisted  
81 temporarily with the focal species, but eventually went extinct. Because population dynamics

82 varied among replicates and, hence the variation in competitive strength at the initial stages of  
83 the experiment, we investigated the effect of ghost competition. More precisely, we wanted to  
84 investigate whether we could find long-term evolutionary effects (measured with fecundity as  
85 a proxy of fitness) due to differences in initial selection pressures caused by an unsuccessful  
86 species or ghost species. For a better interpretation of the magnitude of this adaptation, we  
87 compared these results with a treatment without the competing species. This treatment with  
88 intraspecific competition only started with the same total initial density.

89 We found a positive correlation between higher densities of the competitor during the initial  
90 stages of the experiment and reproductive performance. This correlation was independent of  
91 time, indicating that ghost species are important for the long-term performance of initially  
92 coexisting species. We could not prove adaptation of the populations under interspecific  
93 competition to the novel host as no significant differences with the control population were  
94 found on the novel environment, we did find this difference with the control under the  
95 intraspecific competition treatment. However, no significant differences were found between  
96 the higher density of the competitor and the intraspecific treatment, suggesting that stronger  
97 interspecific competition can lead to similar local adaptation as purely intraspecific  
98 competition. We conclude that ghost competition is an underestimated process for adaptation  
99 and may lead to differences in long-term local adaptation.

## 100 MATERIALS AND METHODS

### 101 Study species: *Tetranychus urticae* and *T. ludeni*

102 Our focal species was the two-spotted spider mite, *Tetranychus urticae* Koch, which was  
103 exposed to competition from the red-legged spider mite, *Tetranychus ludeni* Zacher. Both  
104 species are members of the family Tetranychidae (Acari, Arachnida). These herbivorous mite  
105 species are well suitable for experimental evolution due to their small body sizes ( $\pm 0.4$  mm),  
106 which makes it possible to maintain large populations in the lab, and due to their short  
107 generation time of about 1-2 weeks depending on the temperature and the host plant (Zhang,  
108 2003). Both species are haplodiploid (Zhang, 2003; Clemente *et al.*, 2018). Fast responses to  
109 selection are known to occur after just 10 generations (Belliere, Montserrat, & Magalhaes,  
110 2010). The high standing genetic variation in established populations is suitable for local  
111 adaptation and around fifteen generations are sufficient to detect local adaptation (Gould,  
112 1979; Fry, 1989; Magalhães *et al.*, 2007, 2009; Bonte *et al.*, 2010).

113

### 114 Experimental set-up

115 For this study, 13 isofemale lines of *T. urticae* were used (Bitume *et al.*, 2013). The initial  
116 population for these isofemale lines was the LS-VL line that was maintained on bean plants  
117 *Phaseolus vulgaris* Prelude and initiated from about 5000 spider mites from roses in October  
118 2000 (Ghent, Belgium). We chose to further subject these isofemale lines to inbreeding by  
119 mother-son mating for one more generation prior to the experiments. It may sound  
120 counterintuitive to use inbred populations for an evolutionary experiment that mainly uses  
121 standing genetic variation because novel genetic variation through immigration could not  
122 arise (no spider mites were added during our experiment). We did this, however, to generate  
123 genetically similar replicates and hence starting conditions for the experiment to control for  
124 putative initial drift effects by differences in starting genetic variation, which we deemed

125 more important than potential inbreeding effects, because no effects of inbreeding on genetic  
126 trait variation was found in these and other lines (Van Petegem *et al.*, 2018; Bonte unpub.  
127 results). We additionally created six isofemale lines for the competitor, *T. ludeni*; we wanted  
128 to create 13 lines for this species as well, but were unsuccessful due to low fertility or early  
129 mortality. Both species were initially maintained on two weeks' old bean plants, *Phaseolus*  
130 *vulgaris* 'Prelude'. At the beginning of the actual experiment, the isofemale lines were placed  
131 on novel host islands (four three-weeks-cucumber plants, *Cucumis sativus* 'Tanja', per island)  
132 with only conspecifics or with heterospecifics. A control population of *T. urticae* on bean  
133 plants was created from the same isofemale lines to investigate potential adaptation to the  
134 novel host.

135

136 The novel host islands were placed in boxes with yellow sticky paper (Pherobank) at the  
137 bottom and Vaseline at the walls to avoid contamination between islands, this method is  
138 known to work from previous research (Alzate *et al.*, 2017; Alzate, Etienne, & Dries Bonte,  
139 2018). Eight islands received both *T. urticae* and *T. ludeni*. Eight islands received only *T.*  
140 *urticae* and another eight islands received only *T. ludeni*. These single-species islands  
141 represented the control for our test of the effect of interspecific competition. Each island  
142 started with the same total population size and as similar as possible gene pool for the focal  
143 species. The group with interspecific competition received 26 adult females of *T. urticae* (two  
144 from each of the isofemale lines) and 26 adult females of *T. ludeni*. Twelve *T. ludeni* females  
145 per island came from the six isofemale lines and were supplemented with 14 mites from its  
146 stock population, because of the lack of success for creating more isofemale lines. The use of  
147 the outbred stock population of *T. ludeni* led to larger initial variation in the gene pool among  
148 replicates and thus an unforeseen benefit for differences in initial selection pressures on the  
149 focal species. The group with intraspecific competition of *T. urticae* received four adult

150 females from each of the thirteen isofemale lines (resulting in 52 adult females). The last  
151 group with only the competitor species, *T. ludeni*, received four adult females from the six  
152 isofemale lines and was supplemented with 28 females from its stock population. We started  
153 with this population size, because natural populations usually colonise a plant at small  
154 population sizes.

155 Depending on the level of deterioration, which was censored every week, the islands were  
156 refreshed. This was done by replacing the two oldest plants with two new three-weeks-old  
157 cucumber plants. In this way, sufficient time was provided for a generation of spider mites to  
158 develop on the plants, while allowing the entire population to move toward the fresh leaves.  
159 Hence, while the removed old plants may have contained mites, their number was low  
160 because most mites would have left the deteriorated plant in favour of the fresh plants. The  
161 islands were kept in a climate controlled room (25-30°C and 16:8 LD). The total experiment  
162 lasted for ten months, which is about 25 generations and long enough to detect local  
163 adaptation (Gould, 1979; Fry, 1989; Magalhães *et al.*, 2007, 2009; Bonte *et al.*, 2010). For  
164 logistical reasons the experiment was performed in two blocks with one month difference,  
165 each block consisted of four islands with intraspecific competition and four islands with  
166 interspecific competition.

167

### 168 Measurements

169 Every two weeks, the density of the spider mites on the experimental cucumber populations  
170 was measured by counting adult females on a square of 1 x 1 cm. The location of the square  
171 was right next to the stalk of the highest, fully grown leaf of the two newest plants of the  
172 island; the abaxial as well as the adaxial side were measured and summed for a total  
173 overview. The location on the leaf was chosen to standardise the measurements in time and  
174 make them comparable. We assessed the density because this gives a better idea about



175 competition than the total population size (which would have been labour intensive to  
176 measure).

177 The congeneric competitor *T. ludeni* went extinct after about two months. To have an  
178 impression about its competitive pressure on the focal species and to explore possible drift  
179 effects due to putative differences in the initial population densities of the focal species, we  
180 calculated the initial density, which we defined as the mean density of the first two  
181 measurements in the first month.

182 Fecundity tests on *T. urticae* females from the control bean and experimental cucumber  
183 populations were performed every two months to determine the level of adaptation. Five two-  
184 spotted spider mite females were sampled from each island and separately placed on a bean  
185 leaf disc for two generations; bean is a very suitable host plant and will not cause a change in  
186 allele frequencies of the evolved lines (Magalhães *et al.*, 2011). These 17 x 27 mm<sup>2</sup> leaf discs  
187 were placed in a petri dish on wet cotton wool and surrounded with paper strip borders. The  
188 common garden conditions of two generations was necessary to exclude juvenile and  
189 maternal effects (Magalhães *et al.*, 2011; Kawecki *et al.*, 2012). Then, the fecundity of two  
190 quiescent deutonymph females that originated from the same common-garden replicate was  
191 tested; one female was put on a bean leaf and one on a cucumber leaf (same set-up as for  
192 common garden) in a climate cabinet of 30°C. Fecundity (number of eggs laid during six  
193 days) was measured based on daily pictures taken. Females that drowned in the cotton before  
194 the sixth day were excluded from the analysis.

195

#### 196 Statistical analysis

197 We used general linear mixed models (GLMMs) with Negative Binomial distribution with log  
198 link to account for overdispersion of the data. The variance was determined as  $\mu * (1 + \mu/k)$  in  
199 which  $\mu$  is the mean and  $k$  is the overdispersion parameter (standard negative binomial

200 parametrisation). Fecundity (eggs laid during six days, tested after two, four, six, eight and ten  
201 months) represented the performance and was the dependent variable of our models.

202

203 We first performed an analysis to investigate the impact of the ghost competitor on the  
204 populations under interspecific competition. Because the performances on both plants differed  
205 significantly (higher fecundity on bean compared to cucumber;  $Z = 5.48$ ,  $p = 4.26e-08$ ) and no  
206 significant interaction effects were observed, we subsequently performed separate analyses  
207 for performance on bean and cucumber. Fixed explanatory effects in the full model were  
208 initial density of the competitor (continuous variable) through time (months; categorical  
209 variable). We chose a categorical variable instead of a continuous one because differences in  
210 quality of leaves at the different measurements are not unlikely. The islands were treated as  
211 random effects and were nested within the two experimental blocks for the assessment on  
212 bean. We did not use random effects for the cucumber assessment as the random effect  
213 variance was estimated as zero which resulted in convergence errors (Magnusson *et al.*,  
214 2018). Model selection was based on the lowest AICc.

215

216 As we were interested in the magnitude of the differences in performance, we did a further  
217 analysis including also the control population and the intraspecific competition treatment, and  
218 dividing the interspecific competition treatment in a low density and high density treatment,  
219 because we observed that interspecific competition caused lower performance under low  
220 densities than under high densities in the cucumber assessment (this division was at a density  
221 of 2.5 adult females of *T. ludeni* per cm<sup>2</sup>). Fixed explanatory effects included in the full model  
222 were the time in months (categorical variable), the treatment (control, intraspecific  
223 competition, low density and high density interspecific competition) and their interactions.  
224 The islands were treated as random effects and were nested within the two experimental

225 blocks for bean, and not nested in blocks for cucumber (same reason as explained above).

226 Model selection was based on the lowest AICc and the pairwise comparisons of the least

227 square means were adjusted for multiple comparisons based on Tukey's method.

228

229 The estimates provided in the tables are the raw and untransformed estimates for the fixed

230 effects of the final models (negative binomial distribution).

231

232 All analyses were performed in R (version 3.5.1) with glmmTMB version 0.2.2.0 (Brooks *et*

233 *al.*, 2017), MuMIn version 1.42.1 (Barton, 2018), ggplot2 version 3.0.0 (Wickham, 2016),

234 ggpubr version 0.1.8 (Kassambara, 2018).

## 235 RESULTS

236 In absence of a competing species both species survived, although the focal species *T. urticae*  
237 reached higher densities than *T. ludeni* (Fig. 1). In mixed populations, *T. ludeni* went extinct  
238 after about two months and hence we will refer to it as the ghost competitor. Nevertheless, the  
239 ghost competitor left a strong signature on the reproductive performance of the focal species  
240 in the novel environment. A significant positive correlation was found between the initial  
241 density of the competitor and the fecundity of spider mites measured on cucumber ( $Z = 2.33$   
242 and  $p = 0.0199$ ) (Fig. 2b). This effect emerged from the start of the experiment and remained  
243 stable. Performance on the initial host plant, bean, was not related to initial ghost competitor  
244 density. (Table 1 and S1).

245 As absolute performance does not provide insights on the level of adaptation, an additional  
246 analysis was performed in which we quantified the differences among treatments in time on  
247 the novel and the original host. Here, the interspecific competition treatment was divided in a  
248 low density treatment and a high density treatment (depending on the density of the ghost  
249 competitor). We observed that performance of *T. urticae* on bean in the last month was  
250 significantly lower than in the previous months (Fig. 2a; Table 1 and S1). Populations under  
251 intraspecific competition on cucumber had a higher fecundity on cucumber than the control  
252 population of *T. urticae* that had been kept on bean (and fecundity was assessed on cucumber;  
253  $Z = 3.235$  and  $p = 0.0067$ ). This indicates local adaptation to the novel host plant. Our  
254 experimental design is not strictly suitable to assess adaptation in the interspecific competition  
255 treatment, as we did not keep a control mixed population on bean, but we did find that the  
256 high density interspecific competition treatment did not significantly differ from the  
257 intraspecific competition treatment ( $Z = 1.212$  and  $p = 0.6193$ , whereas the low density  
258 treatment had a significantly lower fecundity than the intraspecific competition treatment ( $Z =$   
259  $2.876$  and  $p = 0.0210$ ) (Fig 2b; Table 1 and S1).

260 **DISCUSSION**

261 The process of genetic adaptation to novel environmental conditions is typically studied and  
262 understood from the perspective of the available genetic variation and selection pressures as  
263 imposed by the environment. Because competing species are an intrinsic part of novel  
264 experienced environmental conditions, they are known to mediate sometimes complex  
265 evolutionary processes. Here, we have shown that temporarily coexisting, competing species  
266 that eventually go extinct, can have a long lasting effect on the performance in a novel  
267 environment.

268

269 We have shown that *T. urticae* populations under purely intraspecific competition reached  
270 higher oviposition rates on the novel host plant than the control population maintained on the  
271 initial host plant, implying local adaptation to the novel host (Fig. 2b). This difference in  
272 fecundity with the control population was not found for the interspecific competition  
273 treatment as a whole or for those replicates with low initial densities of the interspecific  
274 competitor, but we did find that *T. urticae* populations that experienced a higher density of the  
275 interspecific competitor during population build-up showed similar oviposition rates as the  
276 intraspecific treatment (Fig. 2b). A likely explanation for the lack of evidence for adaptation  
277 in the interspecific competition treatment (at low initial densities) is initial differences in  
278 population size and subsequent drift effects, while the replicates where *T. ludeni* successfully  
279 reached higher densities during the first month, its selection pressure was stronger eventually  
280 leading to an increase in fecundity of the focal species (Fig. 2b). Our last time point showed a  
281 significant drop in fecundity on the ancestral host plant, bean (Fig. 2a). We attribute this  
282 change to a temporal drop in resource quality rather than to genetic mechanisms as for  
283 instance inbreeding load, because the same decline was observed in the control population,  
284 but not in the performance on cucumber.

285

286 It is known that the competitor, *T. ludeni*, can down-regulate plant defences (Godinho et al.  
287 2016), but this cannot explain the correlation between its higher density and the increased  
288 fecundity of the focal species under interspecific competition (Fig. 2b). The presence of the  
289 ghost competitor was only temporary, so the down-regulation could not persist during the  
290 experiment as plants were refreshed weekly.

291

292 The history of species in a community can have an impact on interspecific interactions  
293 (Fukami, 2015). The magnitudes of such historical contingencies do, however, strongly differ  
294 among species and environments (Vannette & Fukami, 2014). Differences in historical  
295 contingency have been put forward as an explanation for the fact that some populations can  
296 experience radiations, whereas others from the same clade are not capable to achieve this  
297 under seemingly similar conditions (Seehausen, 2007). Our results experimentally confirm  
298 this perspective and suggest that increased interspecific competition led to higher selection  
299 pressures and thus improved performance. Our results coincide in this respect with other  
300 empirical work demonstrating that increased competition with heterospecifics increased local  
301 adaptation in bunchgrasses (Rice & Knapp, 2008). Similarly, intraguild predation between  
302 lizard species increased the selection pressure and led to strong divergence in morphological  
303 adaptation as associated with niche specialisation (Stuart *et al.*, 2014).

304

305 The higher densities of competing species exert a higher selection pressure that leads to  
306 comparable level of adaptation as under intraspecific competition. Intraspecific competition is  
307 known to push towards ecological specialisation (Silvertown, 2004). As seen in the ecological  
308 dynamics, initially higher densities of *T. urticae* were found in the intraspecific competition  
309 treatment compared to the treatment containing both species (Fig. 1), which could exert

310 stronger intraspecific competition. Intraspecific effects are found to be particularly strong in  
311 those cases where communities are affected by indirect interactions such as cascading effects  
312 (Des Roches *et al.*, 2018). Given that we are working in a system with entire plants, direct and  
313 indirect interactions between the spider mites and their host plants are very likely. Many  
314 examples are found where indirect interactions are induced after a herbivore attack (e.g. the  
315 release of volatiles to attract natural enemies, activation or production of toxins or defensive  
316 structures; Zhang *et al.*, 2009; Kant *et al.*, 2015). We do note that the observed high densities  
317 may be an artefact of the experiment, where refreshing plants might have kept the population  
318 densities higher than in natural populations and thus might have promoted intraspecific  
319 competition.

320

321 In conclusion, the initial strength of interspecific competition has a significant impact on the  
322 long-term performance of species in novel environments. Even when one species becomes  
323 extinct, the competition signature continues to affect the adaptation process of the successful  
324 species. We thus provide experimental evidence on the impact of ghost species on the long  
325 term performance of populations reaching new environments.

326 **ACKNOWLEDGEMENTS**

327 We thank Viki Vandomme, Angelica Alcantara, Pieter Vantieghem, Katrien Van Petegem,  
328 Stefano Masier, Matti Pisman, Mike Creutz, Hilde De Nil and Johan Bisschop for helping  
329 during the research experiments, and to Sarah Magalhães for providing the strains of *T.*  
330 *ludeni*. We thank the Terrestrial Ecology department of Ghent University and the Centre for  
331 Ecology, Evolution and Environmental Changes of the University of Lisbon for the spider  
332 mite populations. R.S.E. thanks the Netherlands Organisation for Scientific Research (NWO)  
333 for financial support through a VICI grant (VICI grant number 865.13.00). K.B. thanks the  
334 Special Research Fund (BOF) of Ghent University and the Ubbo Emmius sandwich program  
335 of the University of Groningen. DB and RSE are supported by the FWO network EVENET  
336 (W0.003.16N) and FWO research grant G018017N.

337

338 The authors declare no conflicts of interest.



339 **AUTHOR CONTRIBUTIONS**

340 The idea and the design of the study was developed by K.B., D.B. and R.S.E. The data was  
341 collected by K.B. and F.M. and the statistical analyses were performed by K.B. K.B. wrote  
342 the draft of the manuscript and all authors contributed to revisions and discussions.  
343

344 **REFERENCES**

345 **Alzate A, Bisschop K, Etienne RS, et al. 2017.** Interspecific competition counteracts  
346 negative effects of dispersal on adaptation of an arthropod herbivore to a new host. *Journal of*  
347 *Evolutionary Biology* **30**: 1966–1977.

348 **Alzate A, Etienne RS & Dries Bonte |. 2018.** Experimental island biogeography  
349 demonstrates the importance of island size and dispersal for the adaptation to novel habitats.  
350 *Global Ecol Biogeogr*: 1–10.

351 **Barton K. 2018.** MuMIn. R package version 1.42.1.

352 **Belliure B, Montserrat M & Magalhaes S. 2010.** Mites as models for experimental  
353 evolution studies. *Acarologia* **50**: 513–529.

354 **Bitume E V., Bonte D, Ronce O, et al. 2013.** Density and genetic relatedness increase  
355 dispersal distance in a subsocial organism. *Ecology Letters* **16**: 430–437.

356 **Bolnick DI. 2001.** Intraspecific competition favours niche width expansion in *Drosophila*  
357 *melanogaster*. *Nature* **410**: 463–466.

358 **Bonte D, De Roissart A, Vandegehuchte ML, et al. 2010.** Local adaptation of aboveground  
359 herbivores towards plant phenotypes induced by soil biota. *PLoS ONE* **5**: e11174.

360 **Brooks ME, Kristensen K, van Benthem KJ, et al. 2017.** glmmTMB balances speed and  
361 flexibility among packages for zero-inflated generalized linear mixed modeling. *The R*

362 *Journal* **9**: 378–400.

363 **Clemente SH, Santos I, Ponce R, et al. 2018.** Despite reproductive interference, the net  
364 outcome of reproductive interactions among spider mite species is not necessarily costly.

365 *Behavioral Ecology* **29**: 321–327.

366 **Diamond J, Pimm SL, Gilpin ME, et al. 1989.** Rapid evolution of character displacement in  
367 Myzomelid honeyeaters. *The American Naturalist* **134**: 675–708.

368 **Fry JD. 1989.** Evolutionary adaptation to host plants in a laboratory population of the  
369 phytophagous mite *Tetranychus urticae* Koch. *Oecologia* **81**: 559–565.

370 **Fukami T. 2015.** Historical contingency in community assembly: integrating niches, species  
371 pools, and priority effects. *Annual Review of Ecology, Evolution, and Systematics* **46**: 1–23.

372 **Godinho PD, Janssen A, Dias T, et al. 2016.** Down-regulation of plant defence in a resident  
373 spider mite species and its effect upon con- and heterospecifics. *Oecologia* **180**: 161–167.

374 **Gould F. 1979.** Rapid host range evolution in a population of the phytophagous mite  
375 *Tetranychus urticae* Koch. *Evolution* **33**: 791–802.

376 **Hawkes C V. & Keitt TH. 2015.** Resilience vs. historical contingency in microbial responses  
377 to environmental change. *Ecology Letters* **18**: 612–625.

378 **Holmes EE & Wilson HB. 1998.** Running from trouble: long-distance dispersal and the  
379 competitive coexistence of inferior species. *The American Naturalist* **151**: 578–586.

380 **Kant MR, Jonckheere W, Knecht B, et al. 2015.** Mechanisms and ecological consequences  
381 of plant defence induction and suppression in herbivore communities. *Annals of Botany* **115**:  
382 1015–1051.

383 **Kassambara A. 2018.** ggpubr: ‘ggplot2’ based publication ready plots. R package version  
384 0.1.8.

- 385 **Kawecki TJ, Lenski RE, Ebert D, et al. 2012.** Experimental evolution. *Trends in Ecology*  
386 *and Evolution* **27**: 547–560.
- 387 **Lankau RA. 2011.** Rapid evolutionary change and the coexistence of species. *Annual Review*  
388 *of Ecology, Evolution, and Systematics* **42**: 335–54.
- 389 **Law R & Daniel Morton R. 1996.** Permanence and the assembly of ecological communities.  
390 *Ecology* **77**: 762–775.
- 391 **Lawrence D, Fiegna F, Behrends V, et al. 2012.** Species interactions alter evolutionary  
392 responses to a novel environment. *PLoS Biology* **10**: e1001330.
- 393 **Lindsey HA, Gallie J, Taylor S, et al. 2013.** Evolutionary rescue from extinction is  
394 contingent on a lower rate of environmental change. *Nature* **494**: 463–467.
- 395 **Magalhães S, Blanchet E, Egas M, et al. 2009.** Are adaptation costs necessary to build up a  
396 local adaptation pattern? *BMC Evolutionary Biology* **9**: 182.
- 397 **Magalhães S, Blanchet E, Egas M, et al. 2011.** Environmental effects on the detection of  
398 adaptation. *Journal of Evolutionary Biology* **24**: 2653–2662.
- 399 **Magalhães S, Fayard J, Janssen A, et al. 2007.** Adaptation in a spider mite population after  
400 long-term evolution on a single host plant. *Journal of Evolutionary Biology* **20**: 2016–2027.
- 401 **Magnusson A, Skaug H, Nielsen A, et al. 2018.** Troubleshooting with glmmTMB.
- 402 **Mallon CA, Le Roux X, Van Doorn GS, et al. 2018.** The impact of failure: unsuccessful  
403 bacterial invasions steer the soil microbial community away from the invader's niche. *ISME*  
404 *Journal* **12**: 728–741.
- 405 **Miller TE, terHorst CP & Burns JH. 2009.** The Ghost of Competition Present. *The*  
406 *American Naturalist* **173**: 347–353.

- 407 **Osmond MM & de Mazancourt C. 2013.** How competition affects evolutionary rescue.  
408 *Philosophical transactions of the Royal Society of London B, Biological sciences* **368**:  
409 20120085.
- 410 **Van Petegem K, Moerman F, Dahirel M, et al. 2018.** Kin competition accelerates  
411 experimental range expansion in an arthropod herbivore. *Ecology Letters* **21**: 225–234.
- 412 **Reznick DN & Ghalambor CK. 2001.** *The population ecology of contemporary*  
413 *adaptations: what empirical studies reveal about the conditions that promote adaptive*  
414 *evolution.*
- 415 **Rice KJ & Knapp EE. 2008.** Effects of competition and life history stage on the expression  
416 of local adaptation in two native bunchgrasses. *Restoration Ecology* **16**: 12–23.
- 417 **Des Roches S, Post DM, Turley NE, et al. 2018.** The ecological importance of intraspecific  
418 variation. *Nature Ecology and Evolution* **2**: 57–64.
- 419 **Sarmento RA, Lemos F, Dias CR, et al. 2011.** A herbivorous mite down-regulates plant  
420 defence and produces web to exclude competitors. *PLoS ONE* **6**: 8–15.
- 421 **Schluter D. 1994.** Experimental evidence that competition promotes divergence in adaptive  
422 radiation. *Science* **266**: 798–801.
- 423 **Seehausen O. 2007.** Evolution and ecological theory: chance, historical contingency and  
424 ecological determinism jointly determine the rate of adaptive radiation. *Heredity* **99**: 361–363.
- 425 **Siepielski AM, Nemirov A, Cattivera M, et al. 2016.** Experimental evidence for an eco-  
426 evolutionary coupling between local adaptation and intraspecific competition. *The American*  
427 *Naturalist* **187**: 447–456.
- 428 **Silvertown J. 2004.** The ghost of competition past in the phylogeny of island endemic plants.  
429 *Journal of Ecology* **92**: 168–173.

- 430 **Stuart YE, Campbell TS, Hohenlohe PA, et al. 2014.** Rapid evolution of a native species  
431 following invasion by a congener. *Science* **346**: 463–466.
- 432 **Svanbäck R & Bolnick DI. 2007.** Intraspecific competition drives increased resource use  
433 diversity within a natural population. *Proceedings of the Royal Society B: Biological Sciences*  
434 **274**: 839–844.
- 435 **Vannette RL & Fukami T. 2014.** Historical contingency in species interactions: towards  
436 niche-based predictions. *Ecology Letters* **17**: 115–124.
- 437 **Wickham H. 2016.** *ggplot2: Elegant Graphics for Data Analysis*. Springer-Verlag New  
438 York.
- 439 **Zhang ZQ. 2003.** *Mites of greenhouses: identification, biology and control*. Wallingford:  
440 CABI Publishing.
- 441 **Zhang PJ, Zheng SJ, van Loon JJA, et al. 2009.** Whiteflies interfere with indirect plant  
442 defense against spider mites in Lima bean. *Proceedings of the National Academy of Sciences*  
443 **106**: 21202–21207.
- 444 **Zhao XF, Buckling A, Zhang QG, et al. 2018.** Specific adaptation to strong competitors can  
445 offset the negative effects of population size reductions. *Proceedings of the Royal Society B:*  
446 *Biological Sciences* **285**: 20180007.

447 **FIGURES**

448

449 **Figure 1: Overview of the population density for the different treatments.** Population  
450 density of *T. urticae* (green dots) and *T. ludeni* (red dots) measured as the sum of the abaxial  
451 and adaxial density (number of adult females/cm<sup>2</sup>) per island through time. The lighter  
452 colours correspond to the populations in absence of the competing species and the darker to  
453 the interspecific competition treatment. The grey zone shows the 95% confidence interval.

454

455 **Figure 2: Fecundity (number of eggs during six days) of *T. urticae* assessed on: (a) bean,**  
456 fecundity through time, and **(b) cucumber,** fecundity significantly affected by the initial  
457 density of *T. ludeni* within the inter- and intraspecific competition treatment ( $R^2 = 0.05$ ). The  
458 upper panel shows the significant difference between intraspecific competition on the one  
459 hand and the control and the population under low interspecific competition on the other  
460 hand. The split between low and high interspecific competition in the inter- and intraspecific  
461 competition treatment is illustrated with the vertical black line.

462 **TABLES**

463 *Table 1: Summary of the final GLMM explaining reproductive performance.* (A)

464 Investigation of the variation in density of the ghost competitor through time. The final model

465 for female mites assessed on bean did not include fixed effects; female mites measured on

466 cucumber showed a significant correlation between reproductive performance and the initial

467 density of the competitor was found. (B) Investigation of the magnitude of adaptation. On

468 bean, only a time effect was found in which the last month performed worse for all

469 populations, including control. On cucumber, the treatments were the only explaining

470 variable.

|                                                                                              |             | Estimate  | Std. error | Z value | Pr (> z ) |     |
|----------------------------------------------------------------------------------------------|-------------|-----------|------------|---------|-----------|-----|
| <b>Investigation of the variation in density of the ghost competitor through time</b>        |             |           |            |         |           |     |
| Bean       | (Intercept) | 3.70979   | 0.08988    | 41.27   | <2e-16    | *** |
| Cucumber  | (Intercept) | 3.22094   | 0.08831    | 36.47   | <2e-16    | *** |
|                                                                                              | Comp. Dens. | 0.06929   | 0.02977    | 2.33    | 0.0199    | *   |
| <b>Investigation of the magnitude of the adaptation</b>                                      |             |           |            |         |           |     |
| Bean      | (Intercept) | 3.777932  | 0.079304   | 47.64   | < 2e-16   | *** |
|                                                                                              | 4 months    | 0.021016  | 0.068052   | 0.31    | 0.757     |     |
|                                                                                              | 6 months    | 0.029561  | 0.067775   | 0.44    | 0.663     |     |
|                                                                                              | 8 months    | 0.001468  | 0.067359   | 0.02    | 0.983     |     |
|                                                                                              | 10 months   | -0.309824 | 0.071536   | -4.33   | 1.48e-05  | *** |
| Cucumber  | (Intercept) | 3.52841   | 0.03516    | 100.36  | < 2e-16   | *** |
|                                                                                              | High Dens.  | -0.06953  | 0.05738    | -1.21   | 0.22559   |     |
|                                                                                              | Low Dens.   | -0.20141  | 0.07004    | -2.88   | 0.00403   | **  |
|                                                                                              | Control     | -0.16410  | 0.05072    | -3.24   | 0.00121   | **  |





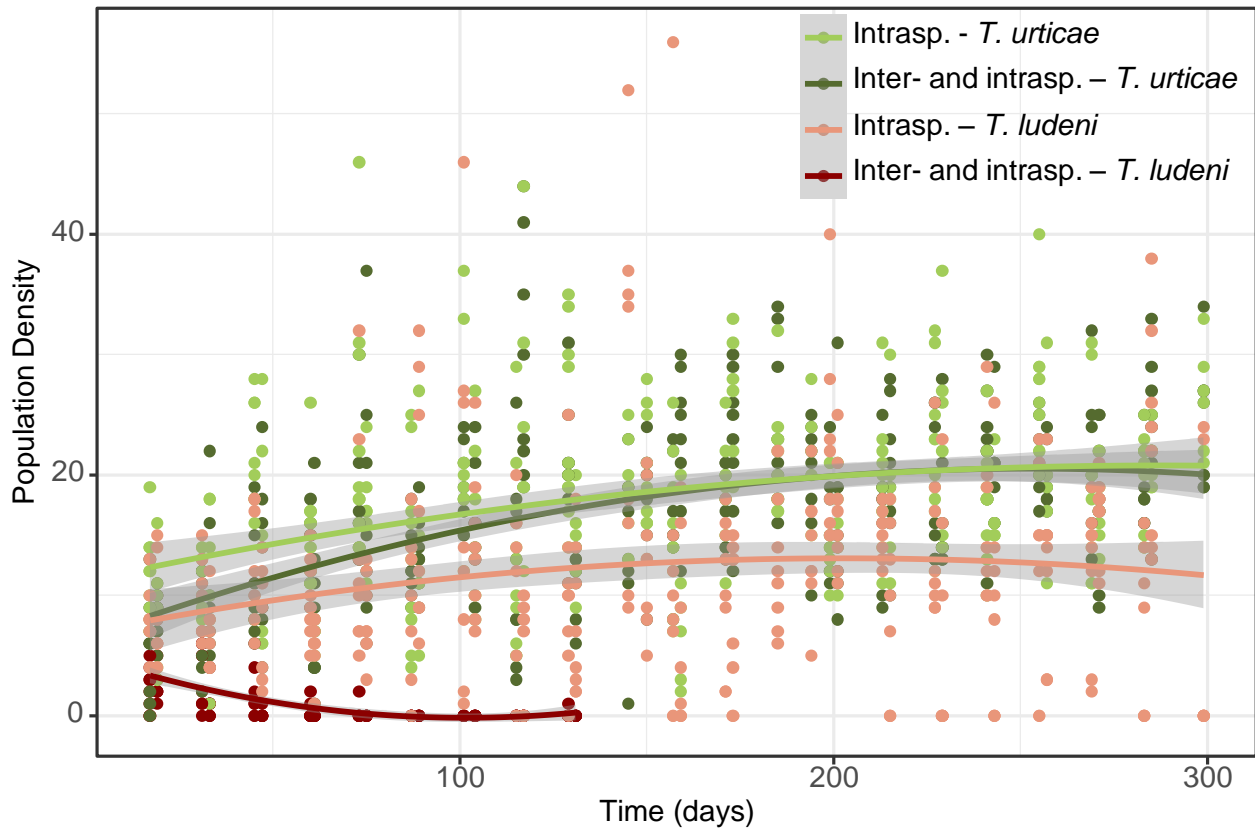

Treatment  only intra  inter + intra  control

**A** assessed on bean

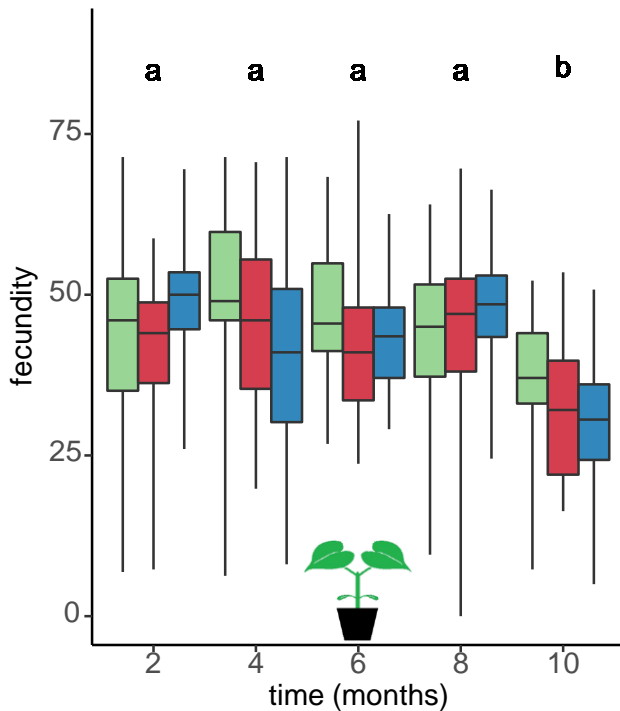

**B** assessed on cucumber

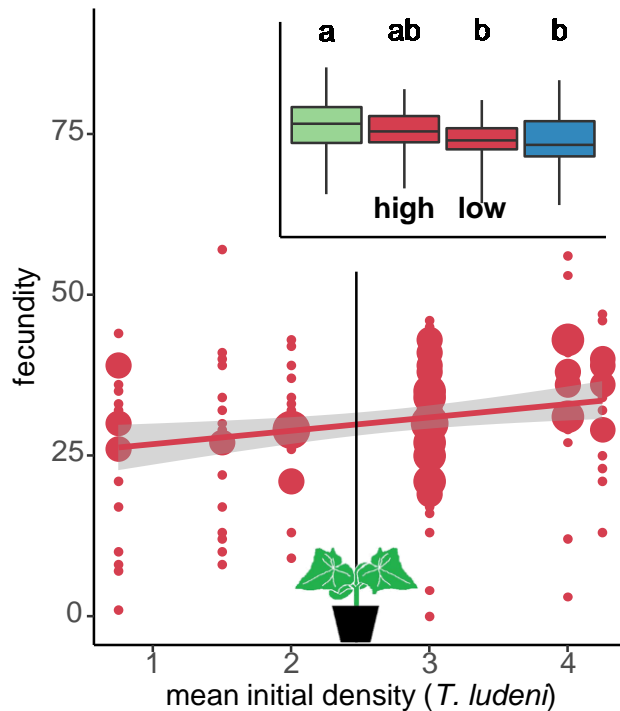

Source: https://www.biorxiv.org/content/10.1101/515833v1.full.pdf
