1 **Performance in a novel environment subject to ghost competition.**

2 Running title: Ghost competition in novel environment

3

4 Karen Bisschop<sup>1,2</sup>, Frederik Mortier<sup>2</sup>, Dries Bonte<sup>2 ‡</sup>, Rampal S. Etienne<sup>1 ‡</sup>

5 ‡ Joint last authorship

6 <sup>1</sup> Groningen Institute for Evolutionary Life Sciences, University of Groningen, P.O. Box

7 11103, NL-9700 CC Groningen, The Netherlands

8 <sup>2</sup> TERC (Terrestrial Ecology Unit), Department of Biology, Ghent University, Karel

9 Lodewijk Ledeganckstraat 35, B-9000 Ghent, Belgium

10

11 Corresponding author: Karen Bisschop, [kbisschop.evo@gmail.com](mailto:kbisschop.evo@gmail.com)

## 12 ABSTRACT

13 **Background.** A central tenet of the evolutionary theory of communities is that competition  
14 impacts evolutionary processes such as local adaptation. Species in a community exert a selection  
15 pressure on other species and may drive them to extinction. We know, however, very little about  
16 the influence of unsuccessful or ghost species on the evolutionary dynamics within the  
17 community.

18 **Methods.** Here, we studied the long-term influence of a ghost competitor on the performance of a  
19 more successful species using experimental evolution. We transferred the spider mite  
20 *Tetranychus urticae* onto a novel host plant under initial presence or absence of a competing  
21 species, the congeneric mite *T. ludeni*.

22 **Results.** The latter species unintentionally went extinct soon after the start of the experiment, but  
23 we nevertheless completed the experiment and found that the initial density of this ghost  
24 competitor positively affected the performance (i.e. fecundity) of the more successful species.  
25 This effect on *T. urticae* even lasted for at least 25 generations.

26 **Discussion.** Our study supports the hypothesis that early experienced selection pressures can  
27 exert a persistent evolutionary signal on species' performance in novel environments.

28

29 **Keywords:** interspecific competition, intraspecific competition, experimental evolution, local  
30 adaptation, spider mites, *Tetranychus urticae*

## 31 INTRODUCTION

32 Species are facing a continuously changing world that they can possibly cope with in various  
33 ways, such as through phenotypic plasticity or by tracking their favoured habitat. If these  
34 solutions are not possible, evolutionary rescue by genetic adaptation may eventually allow  
35 persistence (Lindsey et al., 2013). One factor influencing local adaptation is competition, which  
36 can occur among con- or heterospecifics. Niche overlap is usually larger within than among  
37 species (Bolnick, 2001; Svanbäck & Bolnick, 2007); therefore, it is expected that competition  
38 between conspecifics has a larger impact on evolution than competition at the interspecific level.  
39  
40 Interspecific competition is also known to influence local adaptation, but the effect is still largely  
41 unpredictable (Rice & Knapp, 2008; Alzate et al., 2017; Zhao et al., 2018). First, heterospecific  
42 competitors might modify the selection pressure exerted by the abiotic environment, enhancing or  
43 limiting genetic adaptation to the novel environment (Osmond & de Mazancourt, 2013). Classical  
44 examples of enhanced genetic adaptation are seen in adaptive radiations of three-spined  
45 sticklebacks or fast character displacements in Darwin finches or Myzomelid honeyeaters  
46 (Diamond et al., 1989; Schluter, 1994; Reznick & Ghalambor, 2001). Previously, we found that  
47 additional selection pressure exerted by a congeneric species facilitated adaptation of the focal  
48 species to a novel environment under high dispersal from a maladapted ancestral population  
49 (Alzate et al., 2017). Adaptation to the novel environment can also be reduced by interspecific  
50 competition when there is, for instance, a trade-off between traits responsible for adaptation to  
51 the competing species and to the novel environment (Siepielski et al., 2016).  
52 Furthermore, interspecific competition can create new niches or change the current environment  
53 for species to adapt to. Species may use waste products or adapt to plants with modified defences

54 caused by coexisting individuals (Sarmiento et al., 2011; Lawrence et al., 2012). These new  
55 niches will subsequently create opportunities for adaptive shifts to novel environmental  
56 conditions. This illustrates that competition and facilitation can jointly shape evolution, making it  
57 difficult to study the consequences of interspecific competition alone.

58 As a last scenario, interspecific competition can hinder the process of local adaptation by  
59 restricting resource availability and hence decrease effective population size. The resulting  
60 increased probabilities of genetic drift will then decrease the evolutionary potential and hence the  
61 chance of local adaptation (Lawrence et al., 2012; Osmond & de Mazancourt, 2013; Zhao et al.,  
62 2018).

63  
64 While inferior competitors are expected to eventually go extinct, they may coexist with the more  
65 successful competitors for many generations (Holmes & Wilson, 1998; Lankau, 2011). These  
66 early and non-persisting interactions may leave a strong signature on the future community  
67 dynamics (Law & Daniel Morton, 1996; Miller, TerHorst & Burns, 2009; Mallon et al., 2018),  
68 because they have the possibility to induce large habitat modifications or evolutionary changes in  
69 the more successful species. Historical contingency (i.e. the influence of the arrival time of a  
70 certain species in a community; Fukami 2015) in terms of limitations imposed by so-called ghost  
71 species (Hawkes & Keitt, 2015), may thus have a strong impact on the eco-evolutionary  
72 trajectories of populations and communities, in the same way as successful species do (Fukami,  
73 2015). The role of competition intensity of an inferior species prior to its extinction on the  
74 ecological and evolutionary dynamics of persisting species is still largely unknown, however.

75

76 Here we present results from an evolutionary experiment with two related spider mite species  
77 adapting to a novel host. Both species were placed alone or together on a new host plant and we  
78 wanted to verify how this interspecific competition affects local adaptation. The two competitors  
79 were supposed to be competitively similar, but the experiment demonstrated that this was not the  
80 case: both species could only temporarily coexist. This provided us the unique opportunity to  
81 investigate the influence of ghost competition on adaptation. More precisely, we explored  
82 whether we could detect long-term evolutionary effects on performance (measured as fecundity)  
83 due to differences in initial selection pressures caused by this ghost competitor. We chose the  
84 average of the initial population size of the unsuccessful species during the first month of  
85 coexistence as an indication for the initial selection pressure. These differences in population  
86 sizes arose naturally and can be attributed to selection, as well as drift and founder effects.  
87 *T. ludeni* showed a lower fecundity than *T. urticae* on bean and cucumber in the control  
88 populations, which may explain their rapid extinction. Still, the ghost species *T. ludeni* showed an  
89 effect on the surviving species *T. urticae*, because the eventually achieved strength of adaptation  
90 of *T. urticae* increased with the initial density of *T. ludeni*. We therefore suggest that ghost  
91 competition is an underestimated process for adaptation and may lead to differences in long-term  
92 local adaptation.

## 93 MATERIAL AND METHODS

### 94 Study species

95 We used two species of the family Tetranychidae (Acari, Arachnida): *Tetranychus urticae* Koch,  
96 1836, and *T. ludeni* Zacher, 1913. These herbivorous mite species are highly suitable for  
97 evolutionary experiments due to their small body sizes, their possibility to maintain large  
98 populations in the lab, and short generation times (Zhang, 2003).

99 For this study, we used inbred populations of *T. urticae* from Bitume and colleagues (2013). Each  
100 population originated from two adult females from the LS-VL line (Van Leeuwen, Stillatus &  
101 Tirry, 2004) and was afterwards kept at low population densities. The LS-VL line was collected  
102 from roses in October 2000 (Ghent, Belgium). After this initial collection, all populations were  
103 maintained on bean plants (*Phaseolus vulgaris*, Prelude).

104 Two populations of *T. ludeni* were used: the TI Alval (Lisbon, Portugal) and TI CVM (Lourinhã,  
105 Portugal). Both populations were sampled early autumn 2013 from common morning-glory and  
106 afterwards maintained on bean plants (*P. vulgaris*, Prelude). The founder populations were 160  
107 and 300 individuals for TI Alval and TI CVM respectively. Our evolutionary experiment started  
108 in September 2015, implying that *T. urticae* and *T. ludeni* had been under laboratory conditions  
109 for about fifteen and two years, respectively.

110  
111 For this study, we chose to subject the inbred lines of *T. urticae* (Bitume et al., 2013) to further  
112 inbreeding by mother-son mating for one more generation prior to the experiments. This resulted  
113 in the creation of 13 isofemale lines. It may sound counterintuitive to use inbred populations for  
114 an evolutionary experiment that mainly uses standing genetic variation (note that no spider mites  
115 were added during our experiment), but in this way we could generate genetically similar

116 replicates and control for putative initial drift effects by differences in starting genetic variation.  
117 We deemed this more important than potential inbreeding effects, because no effects of  
118 inbreeding on genetic trait variation were found in these and other lines (Van Petegem *et al.*,  
119 2018; Bonte unpub. results). We additionally created six isofemale lines for *T. ludeni* (coming  
120 from Tl Alval and Tl CVM). We wanted to create 13 lines for this species as well, but were  
121 unsuccessful due to low fertility or early mortality. The stock Tl Alval and Tl CVM populations  
122 were placed on bean plants (four two-weeks-old plants) and are from here on referred to as the  
123 control population of *T. ludeni*. A control population of *T. urticae* was also created from the  
124 created 13 isofemale lines (four mites per line) on bean plants (four two-weeks-old plants). All  
125 populations were kept in a climate-controlled room (25°C – 30°C, 16:8 L:D).

126

### 127 Experimental set-up

128 At the beginning of the actual experiment, the isofemale lines were placed on novel host islands  
129 (two three-weeks-old cucumber plants, *Cucumis sativus* Tanja, per island) with or without  
130 heterospecifics. After the first week, two fresh three-weeks-old cucumber plants were added to  
131 create the island size of the experiment. Afterwards, the islands were weekly refreshed by  
132 replacing the two oldest plants with two new three-weeks-old cucumber plants. In this way,  
133 sufficient time was provided for a generation of spider mites to develop on the new plants, while  
134 allowing the population to move toward the fresh leaves. Hence, while the removed old plants  
135 may have contained mites or unhatched eggs, we chose for this refreshment procedure to  
136 maintain natural movement dynamics. It is for instance known that especially young fertilised  
137 females disperse more (Li & Margolies, 1993) and dispersive individuals may differ in their body  
138 condition or performance compared to sedentary individuals (Bonte et al., 2014; Dahirel et al.,

139 2019). This refreshment procedure may have caused an extra competitive pressure if one species  
140 was more dispersive or delayed its dispersal for avoiding competition, but we preferred to design  
141 the experiment in a way that it resembled more the actual life strategy of spider mites  
142 (colonisation with few founders followed by rapid growth).

143  
144 The novel host islands were placed in boxes with yellow sticky paper (Pherobank) at the bottom  
145 and Vaseline at the walls to avoid contamination between islands; this method is known to work  
146 from previous research (Alzate et al., 2017; Alzate, Etienne & Bonte, 2019; Bisschop et al.,  
147 2019). Eight islands (or replicates) received both *T. urticae* and *T. ludeni*. Eight islands (or  
148 replicates) received only *T. urticae* and another eight islands (or replicates) received only *T.*  
149 *ludeni*. Each island started with the same total population size and as similar as possible gene  
150 pool. The group with both spider mite species received 26 adult females of *T. urticae* (two from  
151 each of the isofemale lines) and 26 adult females of *T. ludeni* (resulting in 52 adult females).  
152 Twelve *T. ludeni* females per island came from the six isofemale lines and were supplemented  
153 with 14 mites from its stock population, because of the lack of success for creating more  
154 isofemale lines. The use of the outbred stock population of *T. ludeni* to supplement the  
155 populations provided an unanticipated opportunity. In this way, we could benefit from the larger  
156 initial genetic variation of *T. ludeni* among replicates and hence differences in initial selection  
157 pressures on *T. urticae*. The group with only *T. urticae* received four adult females from each of  
158 the thirteen isofemale lines (resulting in 52 adult females). The last group with only *T. ludeni*  
159 received four adult females from the six isofemale lines and was supplemented with 28 females  
160 from its stock population. We started with a rather low population size to make it biologically  
161 relevant as natural populations usually colonise plants at small population sizes. All adult female



162 mites were equally distributed over the plants. In an ideal situation, the initial population sizes per  
163 species, the total population density, and the island size should be kept equal, but this is of course  
164 impossible. We chose for the same total population size and no differences among island sizes, as  
165 it is known that differences in densities change both the intra- and interspecific competitive  
166 pressure and that an increase in island size would change the adaptive potential of the treatment  
167 (Alzate, Etienne & Bonte, 2019). We acknowledge that this necessity of differences in initial  
168 population sizes might increase drift effects.

169

170 The total experiment lasted for ten months, which is about 25 generations and long enough to  
171 detect local adaptation (Gould, 1979; Fry, 1989; Magalhães et al., 2007, 2009; Bonte et al.,  
172 2010). For logistical reasons the experiment was performed in two blocks with one month  
173 difference, each block consisted of four replicates per treatment.

174

#### 175 Measurements

176 Every two weeks, the density of the spider mites in the evolutionary experiment was measured by  
177 counting adult females on a square of 1 x 1 cm<sup>2</sup>; the first counting was done after two weeks. The  
178 location of the square was right next to the stalk of the highest, fully grown leaf of the two newest  
179 plants of each island. Both the abaxial as well as the adaxial side were measured and summed for  
180 a total overview. The location on the leaf was chosen to standardise the measurements in time  
181 and make them comparable. The populations of *T. ludeni* under competition with *T. urticae* went  
182 extinct after about two months. To get an impression of its competitive pressure on the more  
183 successful *T. urticae* populations while it was still present, we used the mean population density  
184 of the first month of *T. ludeni*.

185 Fecundity tests for the control populations on bean and for the experimental cucumber  
186 populations were performed every two months to determine the level of adaptation. As the  
187 experimental populations of *T. ludeni* went extinct under competition, we obviously only have  
188 results from fecundity tests on the control population of *T. ludeni*. We chose fecundity as proxy  
189 of adaptation because previous research confirmed it to be the best predictor of adaptation  
190 compared to survival or development (Magalhães et al., 2007; Alzate et al., 2017; Alzate, Etienne  
191 & Bonte, 2019). Five adult females were sampled from each island and separately placed on a  
192 bean leaf disc (17 x 27 mm<sup>2</sup>) for two generations of common-garden to standardise juvenile and  
193 maternal effects (Magalhães et al., 2011; Kawecki et al., 2012). Bean discs were chosen because  
194 this is a very suitable host plant and will not cause a change in allele frequencies of the evolved  
195 lines (Magalhães et al., 2011). These leaf discs were placed in a petri dish on wet cotton wool and  
196 surrounded with paper strip borders. Then, the fecundity of two quiescent deutonymph females  
197 that originated from the same common-garden replicate was tested. One female was put on a  
198 bean leaf and one on a cucumber leaf (same set-up as for common garden) in a climate cabinet of  
199 30°C under 16:8 L:D. Fecundity (number of eggs laid after six days) was measured based on  
200 daily pictures taken. Females that drowned in the cotton before the sixth day were excluded from  
201 the analysis (this was 13.5% for the populations of *T. urticae* without *T. ludeni*, 15% for the  
202 populations of *T. urticae* with the ghost competitor, and 10.5% for the populations of *T. urticae*  
203 in the control treatment maintained on bean). The cucumber plants for the fecundity test after  
204 four months did not grow for one of our two experimental blocks, so we were not able to test  
205 fecundity at that time point. In total, the fecundity was measured for 974 females (exact sample  
206 sizes per treatments are given in the electronic supplementary material Table S1).

207

208 Statistical analysis

209 We used general linear mixed models (GLMMs) with Negative Binomial distribution with log  
210 link to account for overdispersion of the data. The variance was determined as  $\mu * (1 + \mu/k)$  in  
211 which  $\mu$  is the mean and  $k$  is the overdispersion parameter (standard negative binomial  
212 parametrisation).

213

214 *The dynamics and performance of the ghost competitor*

215 We first studied the performance of the control populations that had been maintained on bean of  
216 both species on bean and cucumber, using Generalized Linear Mixed Models (GLMM). The  
217 dependent variable in the maximal model was fecundity (number of eggs after six days) and the  
218 explanatory categorical variables were the plant species (bean or cucumber) and the mite species  
219 (*T. urticae* or *T. ludeni*). Model selection was based on the lowest AICc and a Wald  $\chi^2$  test was  
220 performed on the maximal model to check the reliability of the model selection. Pairwise  
221 comparisons were adjusted for multiple comparisons with Tukey's method.

222

223 *Signature of the ghost competitor on performance of T. urticae*

224 We investigated the impact of the density of *T. ludeni* and of *T. urticae* at the onset of the  
225 experiment (i.e., mean density during the first month) on the fecundity of *T. urticae* on its initial  
226 and novel host plant. The explanatory variables in the maximal model were time (as categorical  
227 variable; 2, 4, 6, 8 or 10 months), the density of *T. ludeni* (continuous variable), the density of *T.*  
228 *urticae* (continuous variable), and the interaction between densities of both species and time. In  
229 this way, we aimed to determine whether it was the own density or the density of the ghost  
230 competitor that affected performance of *T. urticae*. We compared this with an additional model

231 with the total density (summing the density of *T. ludeni* and *T. urticae*), time, and their  
232 interaction to find out whether fecundity was affected by the species' individual densities or just  
233 the total density. The random effects for all models were the island or replicate nested within the  
234 experimental blocks. However, we ran into convergence problems with the results from the  
235 assessment on cucumber as the random effect variance was estimated to be zero (Magnusson et  
236 al., 2018). As a consequence, we only used replicates as random variable. We chose a categorical  
237 variable for time instead of a continuous one, because differences in quality of leaves at the  
238 different measurements were likely and we did not want to assume a linear response of  
239 adaptation. Model selection was based on the lowest AICc and an additional Wald  $\chi^2$  test was  
240 performed on the maximal model. Pairwise comparisons for the slopes and means were adjusted  
241 for multiple comparisons with the Tukey's method.

242  
243 We furthermore used the density assessed through time of the different spider mite populations to  
244 investigate differences in demography between the species with or without competitor. We  
245 divided the density through time in the first two months, when *T. ludeni* was still present under  
246 competition, and the last eight months. The dependent variable in the maximal model was the  
247 density (number of adult female mites per cm<sup>2</sup>) and the explanatory variables the treatment (*T.*  
248 *urticae* with and without competitor, and *T. ludeni* with and without competitor), time  
249 (continuous variable; linear for the first two months, second-degree polynomial for the last eight  
250 months) and their interaction. The random effects were the different islands or replicates within  
251 their experimental block. Model selection, Wald  $\chi^2$  test, and pairwise comparisons were  
252 performed as explained above.

253

254 *Performance without interspecific competitor*

255 Because we were interested in the magnitude of the differences in performance due to the  
256 presence of *T. ludeni*, we did a further analysis including also the control population of *T. urticae*  
257 on bean and the populations of *T. urticae* on cucumber without *T. ludeni*. We investigated the  
258 fecundity in function of the three different treatments (control of *T. urticae* on bean, the  
259 populations of *T. urticae* on cucumber without *T. ludeni*, and those with *T. ludeni*) and time  
260 (categorical variable; 2, 4, 6, 8, or 10 months), and their interaction. The islands were treated as  
261 random effects and were nested within the two experimental blocks. Model selection, Wald  $\chi^2$   
262 test, and pairwise comparisons were performed as explained above.

263  
264 The estimates provided in the tables are the raw and untransformed estimates for the fixed effects  
265 of the final models (negative binomial distribution). All analyses were performed in R (version  
266 3.6.0) with glmmTMB version 0.2.3 (Brooks et al., 2017), MuMIn version 1.43.6 (Barton, 2019),  
267 emmeans version 1.3.5.1 (Lenth, 2019), and fitdistrplus version 1.0-14 (Delignette-Muller, 2015).

## 268 RESULTS

### 269 The dynamics and performance of the ghost competitor

270 In the competition treatments *T. ludeni* went extinct after about two months. While *T. ludeni* was  
271 able to maintain a population on cucumber in the absence of a competing species, it reached a  
272 significantly lower density than *T. urticae* ( $t$  ratio = 8.535 and  $p < 0.0001$  for *T. urticae* under  
273 ghost competition;  $t$  ratio = 9.168 and  $p < 0.0001$  for *T. urticae* without competitor). This  
274 suggests that the host plant itself is not a problem for *T. ludeni*, but that mainly the presence of *T.*  
275 *urticae* hindered the survival of the population (Fig. 1a, electronic supplementary material Table  
276 S2-S4).

277 The fecundity tests on the initial and novel host plant with mites from the control populations of  
278 *T. urticae* and *T. ludeni* (which had been maintained on bean plants and had never been on  
279 cucumber before) showed that *T. urticae* had a significantly lower fecundity on cucumber than on  
280 bean ( $t$  ratio = -3.629 and  $p = 0.0025$ ), and that *T. ludeni* laid significantly fewer eggs on both  
281 bean ( $t$  ratio = -7.463 and  $p < 0.0001$ ) and cucumber ( $t$  ratio = -6.177 and  $p < 0.0001$ ) than *T.*  
282 *urticae*. There was no difference in the performance of *T. ludeni* on bean or cucumber ( $t$  ratio = -  
283 1.012 and  $p = 0.7426$ ). This suggests that the fecundity of *T. ludeni* on the novel host was already  
284 lower than that of *T. urticae* at the onset of the experiment (Fig. 1b, Table 1, electronic  
285 supplementary material Table S2-4).

286

### 287 Signature of the ghost competitor on performance of *T. urticae*

288 Throughout the evolutionary experiment, we measured the densities of the populations of both  
289 spider mite species. During the first month, the ghost competitor (*T. ludeni*) was still present and  
290 the initial density calculated during the first month gave an indication of the pressure exerted by

291 the ghost species on *T. urticae*. We found that the initial density of the ghost competitor  
292 positively affected the fecundity of *T. urticae* on the novel host plant ( $z$  value = 2.33 and  $p$  =  
293 0.0199). This effect emerged from the start of the experiment and remained stable through time  
294 as the minimal model did not include time. Performance on the original host plant, bean, was not  
295 related to initial ghost competitor density. Also, the density of *T. urticae* itself or the total initial  
296 density was not related to performance on both bean and cucumber (Table 1; electronic  
297 supplementary material Table S2-S5).

298 The initial presence of the ghost competitor influenced the demography of *T. urticae* only  
299 slightly. The populations with and without the ghost competitor reached similar equilibrium  
300 densities after the ghost competitor went extinct ( $t$  ratio = -0.666 and  $p$  = 0.7833), and the  
301 increase during the growth phase did not differ significantly ( $t$  ratio = -0.666 and  $p$  = 0.7833). At  
302 the start no significant difference between densities were found, but after one month the density  
303 of *T. urticae* without competition was temporarily significantly higher than the populations of *T.*  
304 *urticae* with *T. ludeni* present ( $t$  ratio = 3.005 and  $p$  = 0.0159) (Table 1; electronic supplementary  
305 material Table S2-S4).

306

### 307 Performance without interspecific competitor

308 We additionally compared the performance of mites from a control population that was  
309 maintained on bean plants with mites adapting to cucumber where in both cases the interspecific  
310 competitor was replaced by conspecifics. The control population had a significantly lower  
311 fecundity on cucumber than the populations grown on cucumber ( $t$  ratio = -3.110 and  $p$  =  
312 0.0056), which suggests local adaptation to the novel host plant for the latter group (Fig. 2b;  
313 Table 1; electronic supplementary information Table S2-S4).

## 314 DISCUSSION

315 The process of genetic adaptation to novel environmental conditions is typically studied and  
316 understood from the perspective of the available genetic variation and selection pressures as  
317 imposed by the environment. Because competing species are an intrinsic part of novel  
318 experienced environmental conditions, they are known to mediate sometimes complex  
319 evolutionary processes. Here we provide empirical evidence that initial competition between two  
320 species can have a long-lasting effect on their performance in a novel environment.

321  
322 The unintentional rapid extinction of *T. ludeni* seems a logical consequence of the higher attained  
323 fecundity of *T. urticae* on the novel host already at the onset of the experiment (Fig. 1b). This  
324 higher fecundity and hence higher growth rate increased the chance for better establishment or  
325 recovery after disturbance (Turcotte, Reznick & Hare, 2011, 2013). Also, populations from *T.*  
326 *urticae* lived under a higher density than populations from *T. ludeni* (Fig. 1a). The density of *T.*  
327 *urticae* on the measured surface was almost fifty percent more than the density of *T. ludeni* when  
328 grown alone. This suggests that *T. urticae* has a higher resource efficiency than *T. ludeni* where  
329 the extra energy can be allocated to a higher fecundity. Higher resource efficiency could for  
330 instance arise from evolved detoxification mechanisms as often found between herbivores and  
331 their hosts (Després, David & Gallet, 2007; Dermauw et al., 2018). After one month the density  
332 of populations of *T. urticae* without heterospecific competition was higher than that of  
333 populations with heterospecific competition, but this difference vanished together with the  
334 extinction of the competitor. This probably means that the ghost competitor decreased the  
335 available resources resulting in a lower population size for *T. urticae* (Fig. 1a).

336



337 We propose that differences in selection pressures exerted by the environment cause the  
338 differences within the treatment under ghost competition, but possibly also between this  
339 treatment and the populations without competitor.

340 We have shown that the higher the density of the ghost competitor was, the higher the fecundity  
341 of *T. urticae* was on the novel host plant (Fig 2b). We speculate that a higher selection pressure  
342 was exerted under a higher initial density of the ghost competitor. This selection pressure  
343 eventually led to an increase in fecundity of the focal species. It is known that the competitor, *T.*  
344 *ludeni*, can down-regulate plant defences (Godinho et al. 2016), but this cannot explain the  
345 correlation between its higher density and the increased fecundity of the focal species even long  
346 after the ghost competitor went extinct, because plants were refreshed weekly.

347 We found that populations of *T. urticae* without *T. ludeni* reached higher fecundity on the novel  
348 host plant than the control population maintained on the initial host plant, implying local  
349 adaptation to the novel host (Fig. 2b). This difference in fecundity with the control population  
350 was not found for the populations that were initially under competition with *T. ludeni*. A likely  
351 explanation for the lack of evidence for adaptation in the treatment under interspecific  
352 competition would be the difference in initial population size and subsequent drift effects. Under  
353 a scenario of strong drift effects we would expect large differences in performance between  
354 replicates; therefore we plotted the fecundity results from the last measured month per replicate  
355 (Fig. 3). Since the differences in fecundity assessed on cucumber among replicates are similar  
356 with and without *T. ludeni* (and thus with high or low initial population size for *T. urticae*). This  
357 indicates that strong drift can be largely discarded as a driver behind the observed evolutionary  
358 dynamics.

359

360 The selection pressure of conspecifics was higher than heterospecifics, which may be because an  
361 initial larger population sizes, but also due to a larger niche overlap (Bolnick, 2001; Svanbäck &  
362 Bolnick, 2007). Furthermore, intraspecific competition is known to push towards ecological  
363 specialisation and may thus enhance adaptation to novel host plants (Silvertown, 2004).  
364 Intraspecific effects are found to be particularly strong in those cases where communities are  
365 affected by indirect interactions such as cascading effects (Des Roches et al., 2018). Many  
366 examples are found where indirect interactions are induced after a herbivore attack (e.g. the  
367 release of volatiles to attract natural enemies, activation or production of toxins or defensive  
368 structures; Zhang *et al.*, 2009; Kant *et al.*, 2015). Given that we used entire plants, such indirect  
369 interactions between herbivores and their host plants likely took place in our experiment.

370  
371 The history of species in a community can have an impact on interspecific interactions (Fukami,  
372 2015). The magnitudes of such historical contingencies do, however, strongly differ among  
373 species and environments (Vannette & Fukami, 2014). Differences in historical contingency have  
374 been put forward as an explanation for the fact that some populations can experience radiations,  
375 whereas others from the same clade are not capable to achieve this under seemingly similar  
376 conditions (Seehausen, 2007). Our results suggest that increased interspecific competition leads  
377 to higher selection pressures and thus improved performance (Fig. 2b). Our results coincide in  
378 this respect with other empirical work demonstrating that increased competition with  
379 heterospecifics increased local adaptation in bunchgrasses (Rice & Knapp, 2008). Similarly,  
380 intraguild predation between lizard species increased the selection pressure and led to strong  
381 divergence in morphological adaptation as associated with niche specialisation (Stuart et al.,  
382 2014).

383

384 Nevertheless, we have to be careful with generalising our results. First, we chose small  
385 populations sizes as they are more biologically relevant, but this may limit adaptation and  
386 establishment (Del Castillo et al., 2011; Yates & Fraser, 2014). We also used populations that  
387 have been maintained in the lab for many generations, probably leading to a decrease in genetic  
388 variation compared to wild populations. The problems we encountered to create isofemale lines  
389 for *T. ludeni* could be an indication of inbreeding depression. However, we are confident that our  
390 results are robust as we could still provide evidence for local adaptation in the populations of *T.*  
391 *urticae* without competitor (Fig. 2b). This suggests that the initial amount of genetic variation did  
392 not limit *T. urticae* in our study.

393 Second, it is impossible to add a competitor without changing total population sizes, population  
394 densities, or island sizes; all of these are affecting genetic variation and drift (Del Castillo et al.,  
395 2011; Alzate, Etienne & Bonte, 2019). As it is known that larger populations usually contain  
396 more genetic variation, we chose to standardise this by means of isofemale lines, knowing that  
397 this might create differences in drift among treatments. One way to better disentangle the effects  
398 of drift from those of selection with our small population size would have been to increase the  
399 number of replicates which was difficult for logistical reasons.

400 Third, our experimental design is not strictly suitable to assess adaptation in the interspecific  
401 competition treatment, as we did not keep a control mixed population on bean. Hence, we cannot  
402 disentangle the effect of changes in fecundity due to competition (independent of the novel  
403 environment) from the effect of competition on adaptation to the novel environment. Although  
404 this means that we cannot detect adaptation in the treatment under ghost competition, we did find

405 a positive influence of the density of the ghost competitor on fecundity, meaning that initial  
406 selection pressures substantially matter and providing evidence for eco-evolutionary dynamics.

407

408 In conclusion, we did find indications for local adaptation in the populations without ghost  
409 competition as the performance increased on the novel host compared to a control population.

410 Furthermore, we have shown the importance of initial selection pressures such as ghost

411 competition. Even when one species becomes extinct, the competition signature continues to

412 affect the adaptation process of the successful species. We thus provide experimental evidence on

413 the impact of ghost species on the long-term performance of populations colonizing new

414 environments.

## 415 ACKNOWLEDGEMENTS

416 We thank Viki Vandomme, Angelica Alcantara, Pieter Vantieghem, Katrien Van Petegem,  
417 Stefano Masier, Matti Pisman, Mike Creutz, Hilde De Nil and Johan Bisschop for helping during  
418 the research experiments, and to Sarah Magalhães for providing the strains of *T. ludeni*. We thank  
419 the Terrestrial Ecology department of Ghent University and the Centre for Ecology, Evolution  
420 and Environmental Changes of the University of Lisbon for the spider mite populations. R.S.E.  
421 thanks the Netherlands Organisation for Scientific Research (NWO) for financial support through  
422 a VICI grant (VICI grant number 865.13.00). K.B. thanks the Special Research Fund (BOF) of  
423 Ghent University and the Ubbo Emmius sandwich program of the University of Groningen. DB  
424 and RSE are supported by the FWO network EVENET (W0.003.16N) and FWO research grant  
425 G018017N.

426

427 The authors declare no conflicts of interest.

## 428 REFERENCES

- 429 Alzate A, Bisschop K, Etienne RS, Bonte D. 2017. Interspecific competition counteracts negative  
430 effects of dispersal on adaptation of an arthropod herbivore to a new host. *Journal of*  
431 *Evolutionary Biology* 30:1966–1977. DOI: 10.1111/jeb.13123.
- 432 Alzate A, Etienne RS, Bonte D. 2019. Experimental island biogeography demonstrates the  
433 importance of island size and dispersal for the adaptation to novel habitats. *Global Ecol*  
434 *Biogeogr* 28:238–247. DOI: 10.1111/geb.12846.
- 435 Barton K. 2019. MuMIn: multi-model inference. R package version 1.43.6. Available at  
436 <https://cran.r-project.org/package=MuMIn>
- 437 Bisschop K, Mortier F, Etienne RS, Bonte D. 2019. Transient local adaptation and source–sink  
438 dynamics in experimental populations experiencing spatially heterogeneous environments.  
439 *Proceedings of the Royal Society B: Biological Sciences* 286:20190738. DOI:  
440 10.1098/rspb.2019.0738.
- 441 Bitume E V., Bonte D, Ronce O, Bach F, Flaven E, Olivieri I, Nieberding CM. 2013. Density and  
442 genetic relatedness increase dispersal distance in a subsocial organism. *Ecology Letters*  
443 16:430–437. DOI: 10.1111/ele.12057.
- 444 Bolnick DI. 2001. Intraspecific competition favours niche width expansion in *Drosophila*  
445 *melanogaster*. *Nature* 410:463–466. DOI: 10.1038/35068555.
- 446 Bonte D, De Roissart A, Vandegheuchte ML, Ballhorn DJ, van Leeuwen T, de la Peña E. 2010.  
447 Local adaptation of aboveground herbivores towards plant phenotypes induced by soil biota.  
448 *PLoS ONE* 5:e11174. DOI: 10.1371/journal.pone.0011174.
- 449 Bonte D, De Roissart A, Wybouw N, Van Leeuwen T. 2014. Fitness maximization by dispersal:  
450 evidence from an invasion experiment. *Ecology* 95:3104–3111. DOI: 10.1890/13-2269.1.

- 451 Brooks ME, Kristensen K, van Benthem KJ, Magnusson A, Berg CW, Nielsen A, Skaug HJ,  
452 Mächler M, Bolker BM. 2017. glmmTMB balances speed and flexibility among packages  
453 for zero-inflated generalized linear mixed modeling. *The R Journal* 9:378–400. DOI:  
454 10.3929/ETHZ-B-000240890.
- 455 Del Castillo RF, Trujillo-Argueta S, Sánchez-Vargas N, Newton AC. 2011. Genetic factors  
456 associated with population size may increase extinction risks and decrease colonization  
457 potential in a keystone tropical pine. *Evolutionary Applications* 4:574–588. DOI:  
458 10.1111/j.1752-4571.2010.00177.x.
- 459 Dahirel M, Masier S, Renault D, Bonte D. 2019. The distinct phenotypic signatures of dispersal  
460 and stress in an arthropod model: from physiology to life history. *The Journal of*  
461 *experimental biology* 222:jeb203596. DOI: 10.1242/jeb.203596.
- 462 Delignette-Muller ML. 2015. fitdistrplus: an R package for fitting distributions. *Journal of*  
463 *Statistical Software* 64:1–34. DOI: 10.18637/jss.v064.i04.
- 464 Dermauw W, Pym A, Bass C, Van Leeuwen T, Feyereisen R. 2018. Does host plant adaptation  
465 lead to pesticide resistance in generalist herbivores? *Current Opinion in Insect Science*  
466 26:25–33. DOI: 10.1016/j.cois.2018.01.001.
- 467 Després L, David JP, Gallet C. 2007. The evolutionary ecology of insect resistance to plant  
468 chemicals. *Trends in Ecology and Evolution* 22:298–307. DOI: 10.1016/j.tree.2007.02.010.
- 469 Diamond J, Pimm SL, Gilpin ME, LeCroy M. 1989. Rapid evolution of character displacement in  
470 Myzomelid honeyeaters. *The American Naturalist* 134:675–708. DOI: 10.1086/285006.
- 471 Fry JD. 1989. Evolutionary adaptation to host plants in a laboratory population of the  
472 phytophagous mite *Tetranychus urticae* Koch. *Oecologia* 81:559–565. DOI:  
473 10.1007/BF00378969.

- 474 Fukami T. 2015. Historical contingency in community assembly: integrating niches, species  
475 pools, and priority effects. *Annual Review of Ecology, Evolution, and Systematics* 46:1–23.  
476 DOI: 10.1146/annurev-ecolsys-110411-160340.
- 477 Godinho DP, Janssen A, Dias T, Cruz C, Magalhães S. 2016. Down-regulation of plant defence  
478 in a resident spider mite species and its effect upon con- and heterospecifics. *Oecologia*  
479 180:161–167. DOI: 10.1007/s00442-015-3434-z.
- 480 Gould F. 1979. Rapid host range evolution in a population of the phytophagous mite *Tetranychus*  
481 *urticae* Koch. *Evolution* 33:791–802. DOI: 10.1111/j.1558-5646.1979.tb04735.x.
- 482 Hawkes C V., Keitt TH. 2015. Resilience vs. historical contingency in microbial responses to  
483 environmental change. *Ecology Letters* 18:612–625. DOI: 10.1111/ele.12451.
- 484 Holmes EE, Wilson HB. 1998. Running from trouble: long-distance dispersal and the competitive  
485 coexistence of inferior species. *The American Naturalist* 151:578–586. DOI:  
486 10.1086/286143.
- 487 Kant MR, Jonckheere W, Knecht B, Lemos F, Liu J, Schimmel BCJ, Villarroel CA, Ataíde LMS,  
488 Dermauw W, Glas JJ, Egas M, Janssen A, Van Leeuwen T, Schuurink RC, Sabelis MW,  
489 Alba JM. 2015. Mechanisms and ecological consequences of plant defence induction and  
490 suppression in herbivore communities. *Annals of Botany* 115:1015–1051. DOI:  
491 10.1093/aob/mcv054.
- 492 Kawecki TJ, Lenski RE, Ebert D, Hollis B, Olivieri I, Whitlock MC. 2012. Experimental  
493 evolution. *Trends in Ecology and Evolution* 27:547–560. DOI: 10.1016/j.tree.2012.06.001.
- 494 Lankau RA. 2011. Rapid evolutionary change and the coexistence of species. *Annual Review of*  
495 *Ecology, Evolution, and Systematics* 42:335–54. DOI: 10.1146/annurev-ecolsys-102710-  
496 145100.



- 497 Law R, Daniel Morton R. 1996. Permanence and the assembly of ecological communities.  
498 *Ecology* 77:762–775. DOI: 10.2307/2265500.
- 499 Lawrence D, Fiegna F, Behrends V, Bundy JG, Phillimore AB, Bell T, Barraclough TG. 2012.  
500 Species interactions alter evolutionary responses to a novel environment. *PLoS Biology*  
501 10:e1001330. DOI: 10.1371/journal.pbio.1001330.
- 502 Van Leeuwen T, Stillatus V, Tirry L. 2004. Genetic analysis and cross-resistance spectrum of a  
503 laboratory-selected chlorfenapyr resistant strain of two-spotted spider mite (Acari:  
504 Tetranychidae). *Experimental and Applied Acarology* 32:249–261. DOI:  
505 10.1023/B:APPA.0000023240.01937.6d.
- 506 Lenth R. 2019.emmeans: estimated marginal means, aka least-squares means. R package version  
507 1.3.5.1. Available at <https://cran.r-project.org/package=emmeans>
- 508 Li J, Margolies DC. 1993. Effects of mite age, mite density, and host quality on aerial dispersal  
509 behavior in the twospotted spider mite. *Entomologia Experimentalis et Applicata* 68:79–86.  
510 DOI: 10.1111/j.1570-7458.1993.tb01691.x.
- 511 Lindsey HA, Gallie J, Taylor S, Kerr B. 2013. Evolutionary rescue from extinction is contingent  
512 on a lower rate of environmental change. *Nature* 494:463–467. DOI: 10.1038/nature11879.
- 513 Magalhães S, Blanchet E, Egas M, Olivieri I. 2009. Are adaptation costs necessary to build up a  
514 local adaptation pattern? *BMC Evolutionary Biology* 9:182. DOI: 10.1186/1471-2148-9-182.
- 515 Magalhães S, Blanchet E, Egas M, Olivieri I. 2011. Environmental effects on the detection of  
516 adaptation. *Journal of Evolutionary Biology* 24:2653–2662. DOI: 10.1111/j.1420-  
517 9101.2011.02388.x.
- 518 Magalhães S, Fayard J, Janssen A, Carbonell D, Olivieri I. 2007. Adaptation in a spider mite  
519 population after long-term evolution on a single host plant. *Journal of Evolutionary Biology*

- 520 20:2016–2027. DOI: 10.1111/j.1420-9101.2007.01365.x.
- 521 Magnusson A, Skaug H, Nielsen A, Berg CW, Kristensen K, Maechler M, van Bentham K,  
522 Bolker BM, Brooks ME. 2018. Troubleshooting with glmmTMB. Available at [https://cran.r-](https://cran.r-project.org/web/packages/glmmTMB/vignettes/troubleshooting.html)  
523 [project.org/web/packages/glmmTMB/vignettes/troubleshooting.html](https://cran.r-project.org/web/packages/glmmTMB/vignettes/troubleshooting.html)
- 524 Mallon CA, Le Roux X, Van Doorn GS, Dini-Andreote F, Poly F, Salles JF. 2018. The impact of  
525 failure: unsuccessful bacterial invasions steer the soil microbial community away from the  
526 invader's niche. *ISME Journal* 12:728–741. DOI: 10.1038/s41396-017-0003-y.
- 527 Miller TE, TerHorst CP, Burns JH. 2009. The ghost of competition present. *The American*  
528 *Naturalist* 173:347–353. DOI: 10.1086/596531.
- 529 Osmond MM, de Mazancourt C. 2013. How competition affects evolutionary rescue.  
530 *Philosophical transactions of the Royal Society of London B, Biological sciences*  
531 368:20120085. DOI: 10.1098/rstb.2012.0085.
- 532 Van Petegem K, Moerman F, Dahirel M, Fronhofer EA, Vandegheuchte ML, Van Leeuwen T,  
533 Wybouw N, Stoks R, Bonte D. 2018. Kin competition accelerates experimental range  
534 expansion in an arthropod herbivore. *Ecology Letters* 21:225–234. DOI: 10.1111/ele.12887.
- 535 Reznick DN, Ghalambor CK. 2001. The population ecology of contemporary adaptations: what  
536 empirical studies reveal about the conditions that promote adaptive evolution. *Genetica*  
537 112:183–198. DOI: 10.1023/A:1013352109042.
- 538 Rice KJ, Knapp EE. 2008. Effects of competition and life history stage on the expression of local  
539 adaptation in two native bunchgrasses. *Restoration Ecology* 16:12–23. DOI: 10.1111/j.1526-  
540 100X.2007.00257.x.
- 541 Des Roches S, Post DM, Turley NE, Bailey JK, Hendry AP, Kinnison MT, Schweitzer JA,  
542 Palkovacs EP. 2018. The ecological importance of intraspecific variation. *Nature Ecology*

- 543 *and Evolution* 2:57–64. DOI: 10.1038/s41559-017-0402-5.
- 544 Sarmiento RA, Lemos F, Bleeker PM, Schuurink RC, Pallini A, Oliveira MGA, Lima ER, Kant  
545 M, Sabelis MW, Janssen A. 2011. A herbivore that manipulates plant defence. *Ecology*  
546 *Letters* 14:229–236. DOI: 10.1111/j.1461-0248.2010.01575.x.
- 547 Schluter D. 1994. Experimental evidence that competition promotes divergence in adaptive  
548 radiation. *Science* 266:798–801. DOI: 10.1126/science.266.5186.798.
- 549 Seehausen O. 2007. Evolution and ecological theory: chance, historical contingency and  
550 ecological determinism jointly determine the rate of adaptive radiation. *Heredity* 99:361–  
551 363. DOI: 10.1038/sj.hdy.6801047.
- 552 Siepielski AM, Nemirov A, Cattivera M, Nickerson A. 2016. Experimental evidence for an eco-  
553 evolutionary coupling between local adaptation and intraspecific competition. *The American*  
554 *Naturalist* 187:447–456. DOI: 10.1086/685295.
- 555 Silvertown J. 2004. The ghost of competition past in the phylogeny of island endemic plants.  
556 *Journal of Ecology* 92:168–173. DOI: 10.1111/j.1365-2745.2004.00853.x.
- 557 Stuart YE, Campbell TS, Hohenlohe PA, Reynolds RG, Revell LJ, Losos JB. 2014. Rapid  
558 evolution of a native species following invasion by a congener. *Science* 346:463–466. DOI:  
559 10.1126/science.1257008.
- 560 Svanbäck R, Bolnick DI. 2007. Intraspecific competition drives increased resource use diversity  
561 within a natural population. *Proceedings of the Royal Society B: Biological Sciences*  
562 274:839–844. DOI: 10.1098/rspb.2006.0198.
- 563 Turcotte MM, Reznick DN, Hare JD. 2011. The impact of rapid evolution on population  
564 dynamics in the wild: experimental test of eco-evolutionary dynamics. *Ecology Letters*  
565 14:1084–1092. DOI: 10.1111/j.1461-0248.2011.01676.x.

- 566 Turcotte MM, Reznick DN, Hare JD. 2013. Experimental Test of an Eco-Evolutionary Dynamic  
567 Feedback Loop between Evolution and Population Density in the Green Peach Aphid. *The*  
568 *American Naturalist* 181:S46–S57. DOI: 10.1086/668078.
- 569 Vannette RL, Fukami T. 2014. Historical contingency in species interactions: towards niche-  
570 based predictions. *Ecology Letters* 17:115–124. DOI: 10.1111/ele.12204.
- 571 Yates MC, Fraser DJ. 2014. Does source population size affect performance in new  
572 environments? *Evolutionary Applications* 7:871–882. DOI: 10.1111/eva.12181.
- 573 Zhang ZQ. 2003. *Mites of greenhouses: identification, biology and control*. Wallingford: CABI  
574 Publishing. DOI: 10.1079/9780851995908.0000.
- 575 Zhang P-J, Zheng S-J, van Loon JJA, Boland W, David A, Mumm R, Dicke M. 2009. Whiteflies  
576 interfere with indirect plant defense against spider mites in Lima bean. *Proceedings of the*  
577 *National Academy of Sciences* 106:21202–21207. DOI: 10.1073/pnas.0907890106.
- 578 Zhao XF, Buckling A, Zhang QG, Hesse E. 2018. Specific adaptation to strong competitors can  
579 offset the negative effects of population size reductions. *Proceedings of the Royal Society B:*  
580 *Biological Sciences* 285:20180007. DOI: 10.1098/rspb.2018.0007.
- 581

## 582 FIGURES

583 **Figure 1: a)** Overview of the population density for the different treatments. Population density  
584 of *T. urticae* (green dots) and *T. ludeni* (red dots) measured as the sum of the abaxial and adaxial  
585 density (number of adult females/cm<sup>2</sup>) per island through time. The lighter colours correspond to  
586 the populations in absence of the competing species and the darker to the treatment where both  
587 species are present. The grey zone shows the 95% confidence interval. **b)** Comparison of control  
588 populations of *Tetranychus ludeni* and *T. urticae* on bean and cucumber. The fecundity of *T.*  
589 *ludeni* is significantly lower than *T. urticae*, on both bean and cucumber. The violin plots show  
590 the observed data, and the points and lines show the mean model estimates and their 95%  
591 confidence interval, respectively.

592

593 **Figure 2:** Fecundity affected by ghost competition. On the x-axis the initial density of *T. ludeni*  
594 (number of adult females/cm<sup>2</sup>) and the different treatments (*T. urticae* from cucumber but without  
595 *T. ludeni*, *T. urticae* with ghost competition of *T. ludeni*, and the control population of *T. urticae*  
596 from bean) are presented and on the y-axis the fecundity (number of eggs after six days) of *T.*  
597 *urticae*. This fecundity is averaged over time as this variable was not included in the minimal  
598 model. A significant interaction between the density of *T. ludeni* and the fecundity of *T. urticae*  
599 was not found when the fecundity was assessed on (A) bean, but it was found when assessed on  
600 (B) cucumber. Each violin plot is presenting the observed data, while the points and lines show  
601 the means of the model estimate and their 95% confidence interval, respectively.

602 **Figure 3:** Comparison of fecundity measured after ten months between replicates. The different  
603 replicates are given on the x axis and the fecundity (number of eggs after six days) on the y axis.  
604 The coloured points are the real measurements, while the black dot and lines present the mean,  
605 minimum and maximum value respectively. The upper plots are measurements from *T. urticae* on  
606 bean with A) the treatment with *T. ludeni* and B) the treatment without *T. ludeni*. The lower plots  
607 are measurements from *T. urticae* on cucumber with C) the treatment with *T. ludeni* and D) the  
608 treatment without *T. ludeni*.

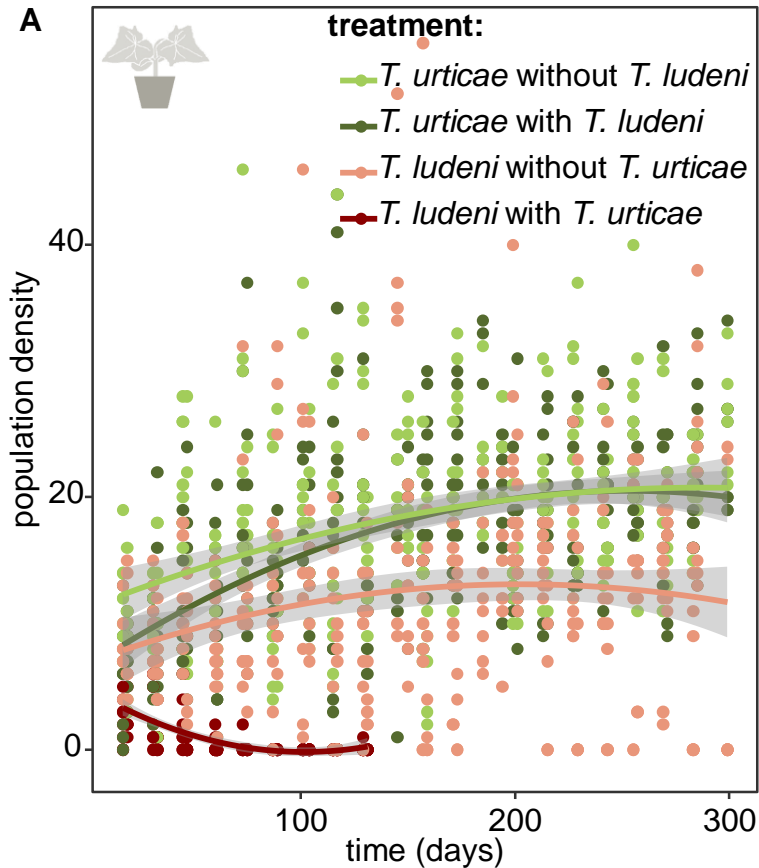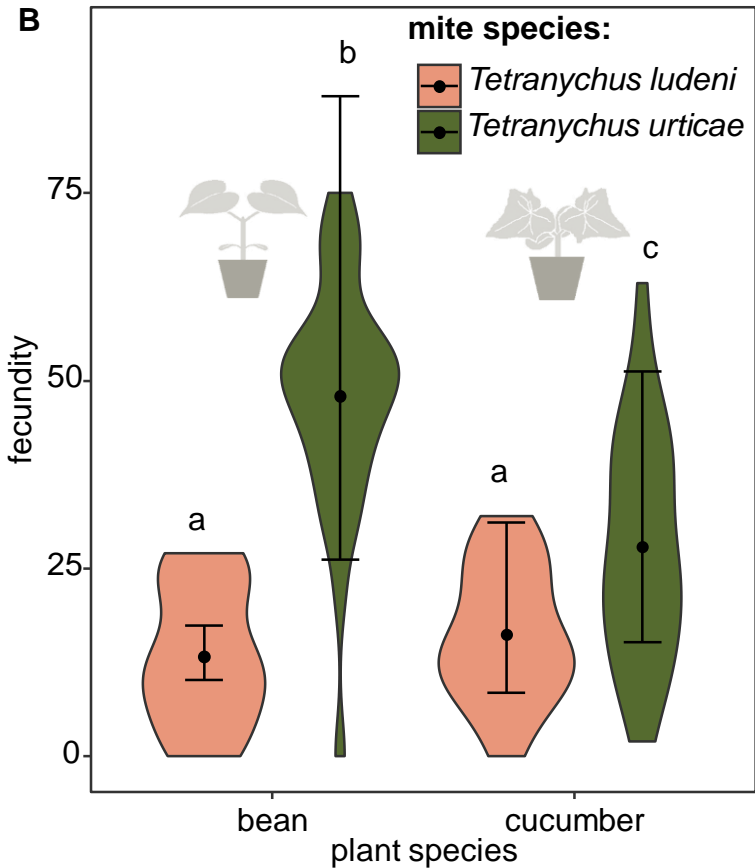

treatment:  *T. urticae* (control)  *T. urticae* (comp.)  *T. urticae* (no comp.)

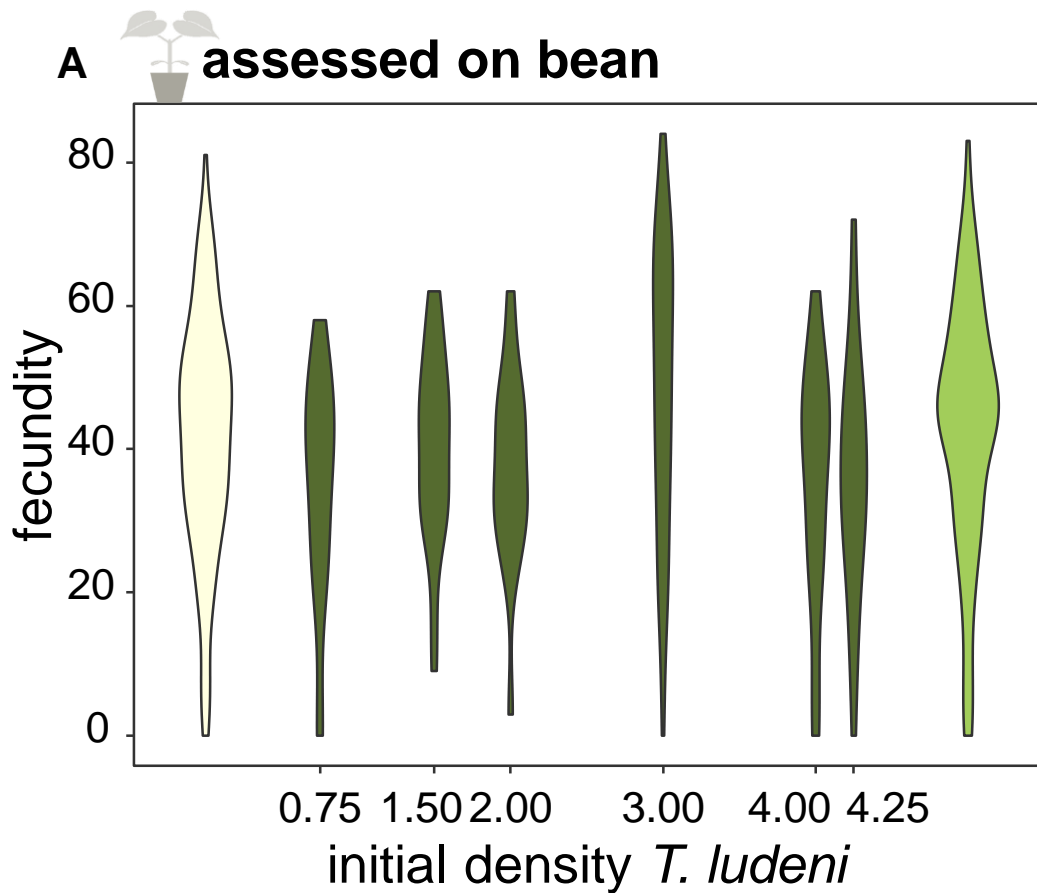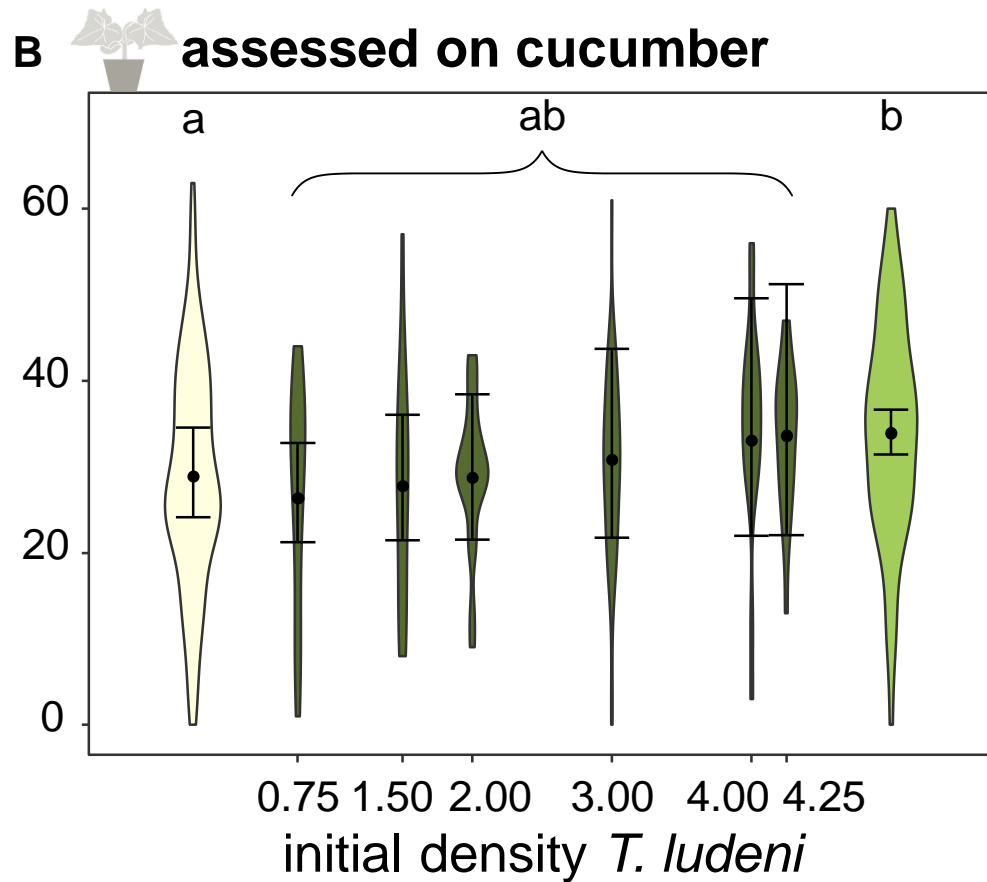



## *T. urticae* assessed on bean

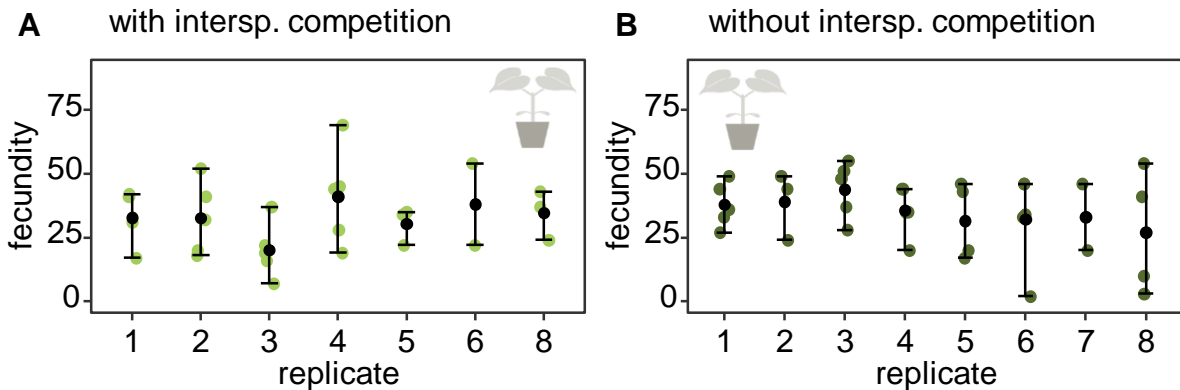

## *T. urticae* assessed on cucumber

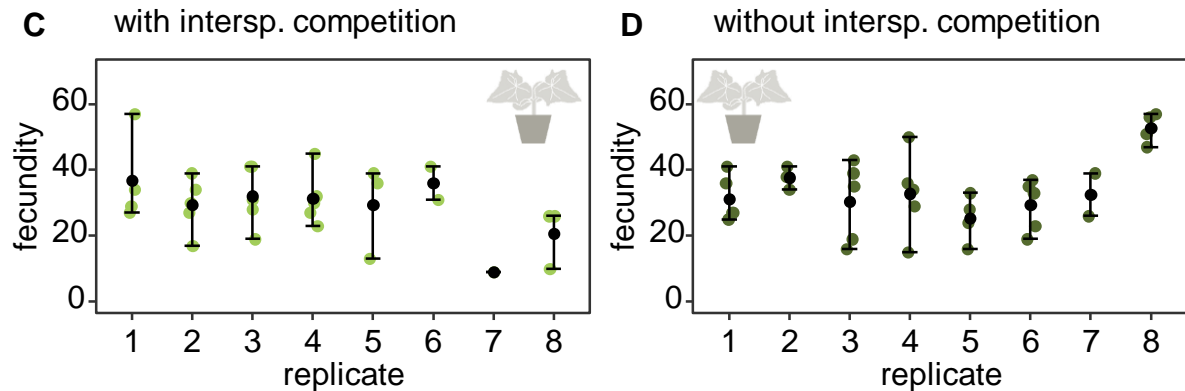

**Table 1:**

**Summary of the final GLMM explaining reproductive performance.**

|                                                                              | Estimate | SE     | z value | P value  |     |
|------------------------------------------------------------------------------|----------|--------|---------|----------|-----|
| <b>The dynamics and performance of the ghost competitor</b>                  |          |        |         |          |     |
| (Intercept) ( <i>T. ludeni</i> on bean)                                      | 2.5867   | 0.1367 | 18.92   | <2e-16   | *** |
| Cucumber                                                                     | 0.1990   | 0.1965 | 1.01    | 0.3114   |     |
| <i>T. urticae</i>                                                            | 1.2838   | 0.1720 | 7.46    | 8.47e-14 | *** |
| Cucumber : <i>T. urticae</i>                                                 | -0.7407  | 0.2468 | -3.00   | 0.0027   | **  |
| <b>Signature of the ghost competitor on performance of <i>T. urticae</i></b> |          |        |         |          |     |
| <u>Fecundity assessed on bean</u>                                            |          |        |         |          |     |
| (Intercept)                                                                  | 3.7098   | 0.0899 | 41.27   | <2e-16   |     |
| <u>Fecundity assessed on cucumber</u>                                        |          |        |         |          |     |
| (Intercept)                                                                  | 3.2209   | 0.0883 | 36.47   | <2e-16   | *** |
| Initial density <i>T. ludeni</i>                                             | 0.0693   | 0.0298 | 2.33    | 0.0199   | *   |
| <u>Density during first two months</u>                                       |          |        |         |          |     |
| (Intercept) ( <i>T. ludeni</i> under comp.)                                  | 1.6678   | 0.3132 | 5.32    | 1.01e-07 | *** |
| <i>T. urticae</i> under comp.                                                | -0.1136  | 0.3814 | -0.30   | 0.7658   |     |
| <i>T. urticae</i> without comp.                                              | 0.2925   | 0.3744 | 0.78    | 0.4346   |     |
| <i>T. ludeni</i> without comp.                                               | 0.2669   | 0.3818 | 0.70    | 0.4845   |     |
| Time                                                                         | -0.0275  | 0.0099 | -2.79   | 0.0053   | **  |
| <i>T. urticae</i> comp. : time                                               | 0.0470   | 0.0117 | 4.00    | 6.26e-05 | *** |
| <i>T. urticae</i> no comp. : time                                            | 0.0454   | 0.0114 | 3.97    | 7.35e-05 | *** |
| <i>T. ludeni</i> no comp. : time                                             | 0.0351   | 0.0117 | 3.01    | 0.0027   | **  |
| <u>Density during last eight months</u>                                      |          |        |         |          |     |
| (Intercept) ( <i>T. urticae</i> under comp.)                                 | 2.9066   | 0.0326 | 89.25   | <2e-16   | *** |
| <i>T. urticae</i> without comp.                                              | 0.0307   | 0.0462 | 0.67    | 0.5054   |     |
| <i>T. ludeni</i> without comp.                                               | -0.4023  | 0.0471 | -8.54   | <2e-16   | *** |
| Time                                                                         | 2.3787   | 0.5468 | 4.35    | 1.36e-05 | *** |
| Time <sup>2</sup>                                                            | -0.9981  | 0.5520 | -1.81   | 0.0706   | .   |
| <b>Performance without interspecific competitor</b>                          |          |        |         |          |     |
| (Intercept) <i>T. urticae</i> without comp.                                  | 3.5241   | 0.0395 | 89.23   | <2e-16   | *** |
| <i>T. urticae</i> under comp.                                                | -0.1119  | 0.0515 | -2.17   | 0.0297   | *   |
| <i>T. urticae</i> control                                                    | -0.1605  | 0.0516 | -3.11   | 0.0019   | **  |
